# Supplementary material for: Tetraphenylethene modified [n]rotaxanes: synthesis, characterization and aggregation-induced emission behavior
Source: Royal Society of Chemistry journal article supplement (doi:10.1039/c5ob00068h), 2015-01-01

Electronic Supplementary Material (ESI) for Organic & Biomolecular Chemistry

This journal is © The Royal Society of Chemistry 2014

Supporting Information for

**Tetraphenylethene Modified [n]Rotaxanes: Synthesis,  
Characterization and Aggregation-Induced Emission Behaviors**

Guoxing Liu,<sup>†</sup> Di Wu,<sup>†</sup> Jinhua Liang, Xie Han, Sheng Hua Liu, Jun Yin\*

*Key Laboratory of Pesticide and Chemical Biology, Ministry of Education, College of Chemistry, Central*

*China Normal University, Wuhan 430079, P. R. China.*

*E-mail: yinj@mail.ccnu.edu.cn*

## Table of Contents

|                                                                                                                                               |   |
|-----------------------------------------------------------------------------------------------------------------------------------------------|---|
| 1. UV-vis spectra of 8, 11, 16, 17, 24 and 25 in CH <sub>3</sub> CN / water mixtures with different fractions of water ( $f_w$ ).....         | 3 |
| 2. Optimized structures based on DFT (B3LYP/6-31G*) calculations.....                                                                         | 4 |
| 3. Partial <sup>1</sup> H NMR spectra of [2]rotaxanes 17a-b.....                                                                              | 4 |
| 4. Photographs of 24 and 25 in CH <sub>3</sub> CN/water mixtures with different fractions of water ( $f_w$ ) taken under UV illumination..... | 5 |
| 5. Appendix: NMR and Mass spectra.....                                                                                                        | 6 |

# 1. UV-vis spectra of 8, 11, 16, 17, 24 and 25 in CH<sub>3</sub>CN/water mixtures with different fractions of water ( $f_w$ ).

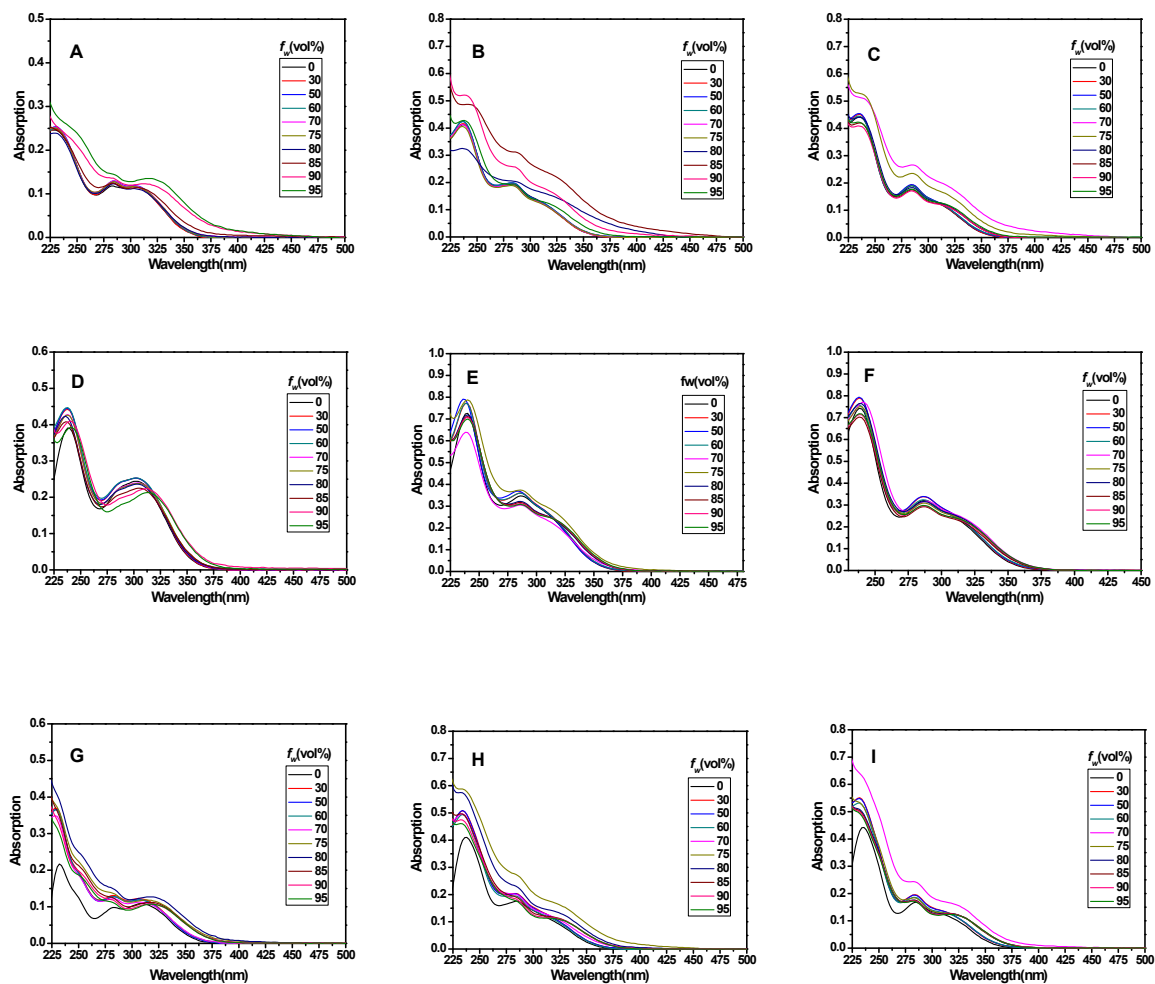

**Figure S1.** UV-vis spectra of 8(A), 11a(B), 11b(C), 16(D), 17a(E), 17b(F), 24(G), 25a(H) and 25b(I) in CH<sub>3</sub>CN/water mixtures with different fractions of water ( $f_w$ ).

## 2. Optimized structures based on DFT (B3LYP/6-31G\*) calculations

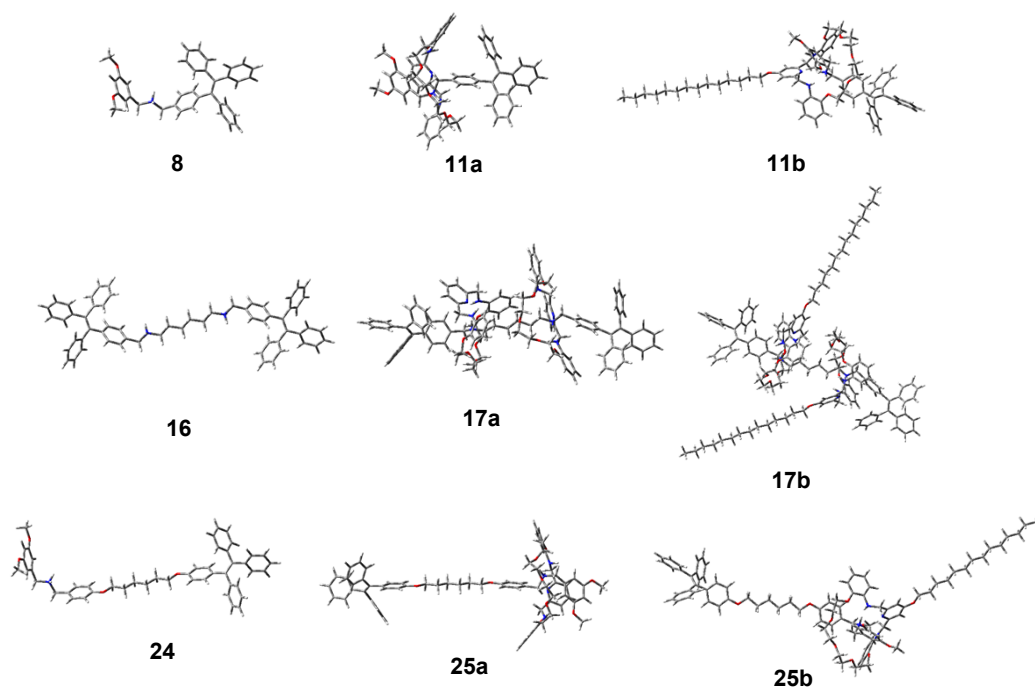

Figure S2. Optimized structures based on DFT (B3LYP/6-31G\*) calculations. **8**, **11a-b**, **16**, **17a-b**, **24** and **25a-b**.

### 3. Partial $^1\text{H}$ NMR spectra of [2]rotaxanes **17a-b**

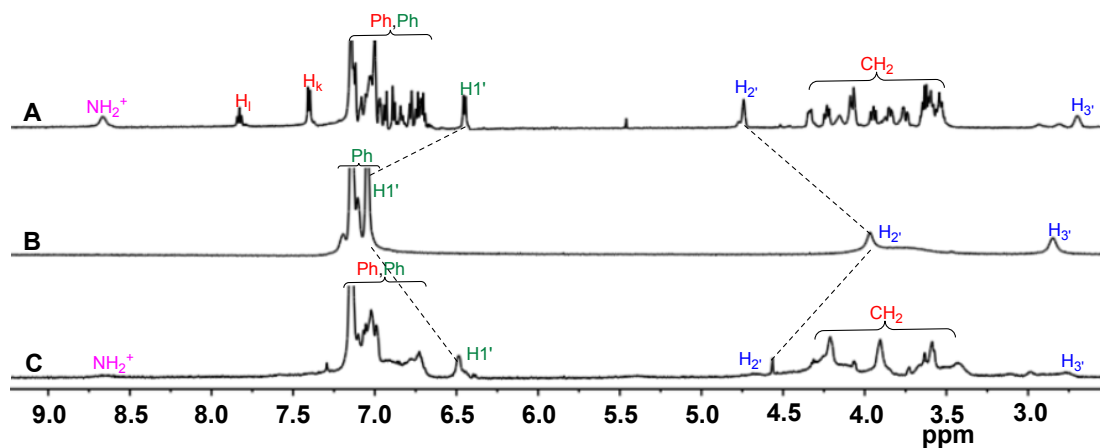

Figure S3.  $^1\text{H}$  NMR spectra (600 MHz in  $\text{CD}_3\text{CN}$  at r.t.) of **17a** (A); **16** (B) and **17b** (C).

4. Photographs of **24** and **25** in  $\text{CH}_3\text{CN}$ /water mixtures with different fractions of water ( $f_w$ ) taken under UV illumination.

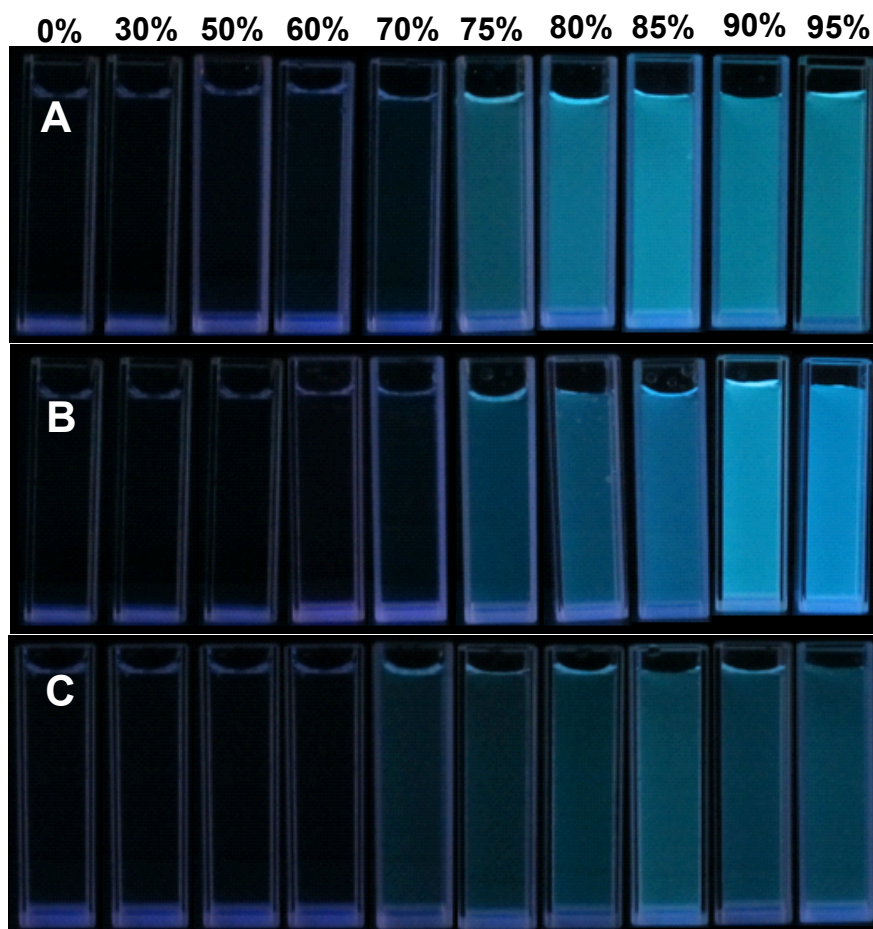

**Figure S4.** Photographs of **24(A)**, **25a(B)** and **25b(C)** in  $\text{CH}_3\text{CN}/\text{water}$  mixtures with different fractions of water ( $f_w$ ) taken under UV illumination.

## 5. NMR and Mass spectra

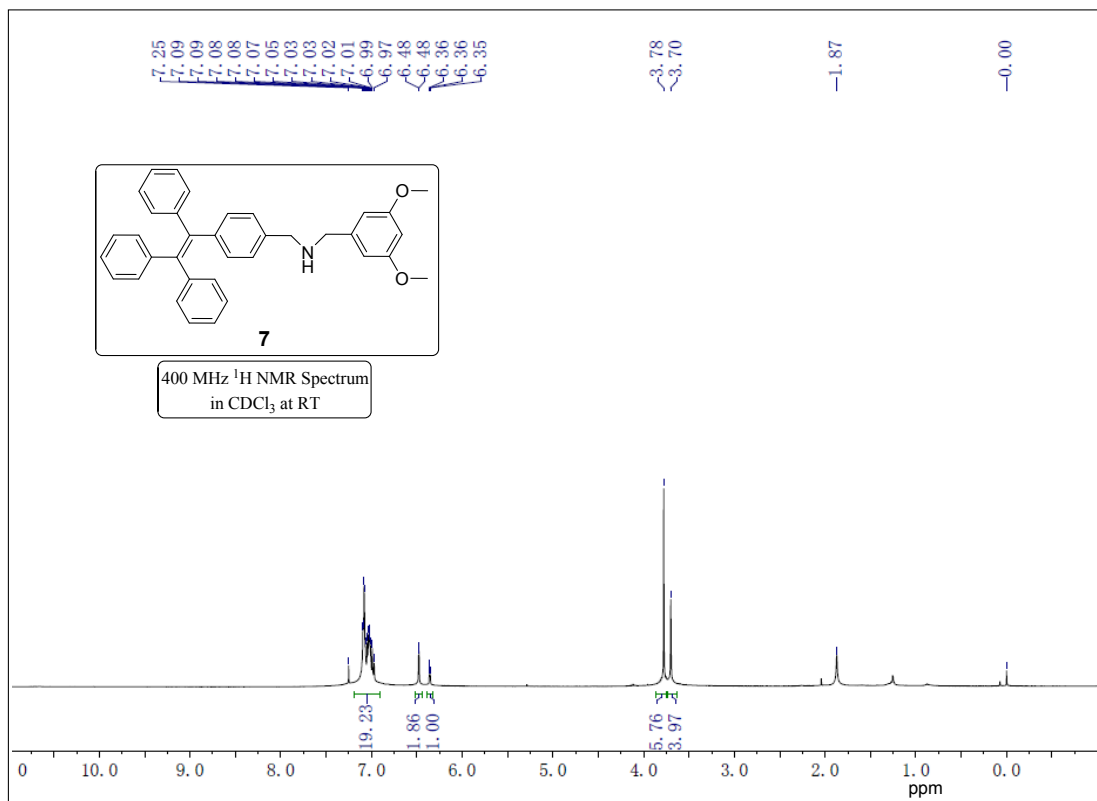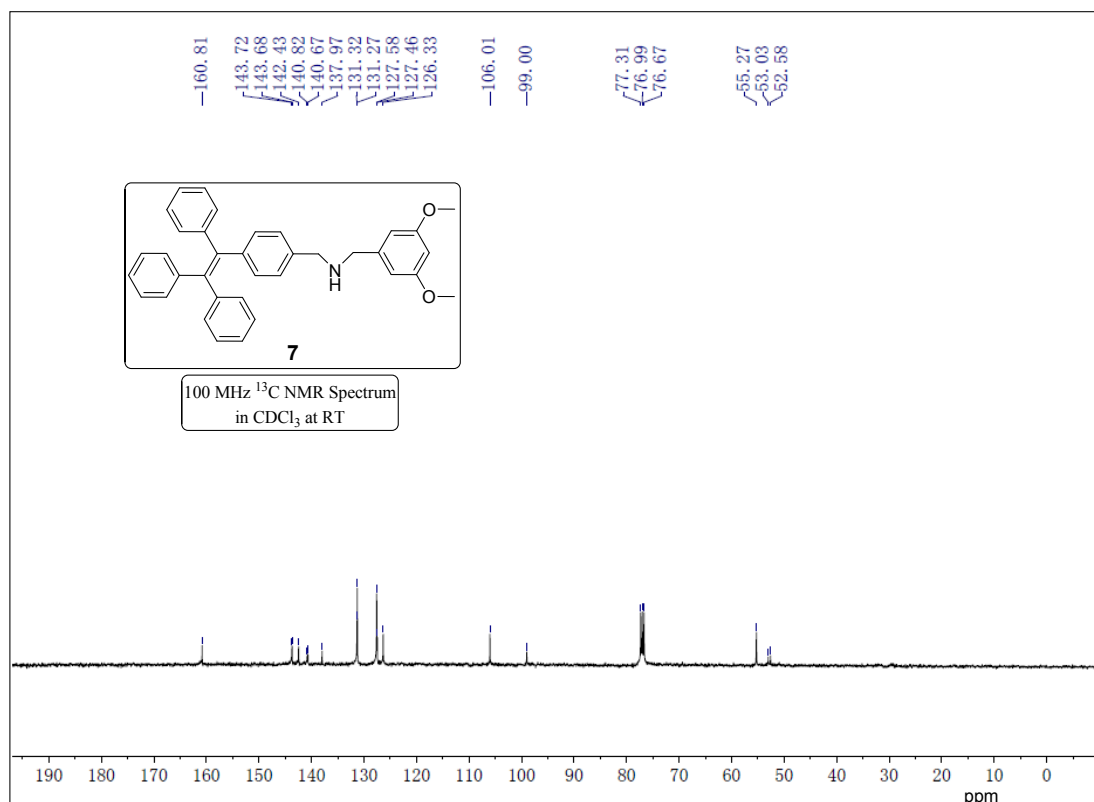

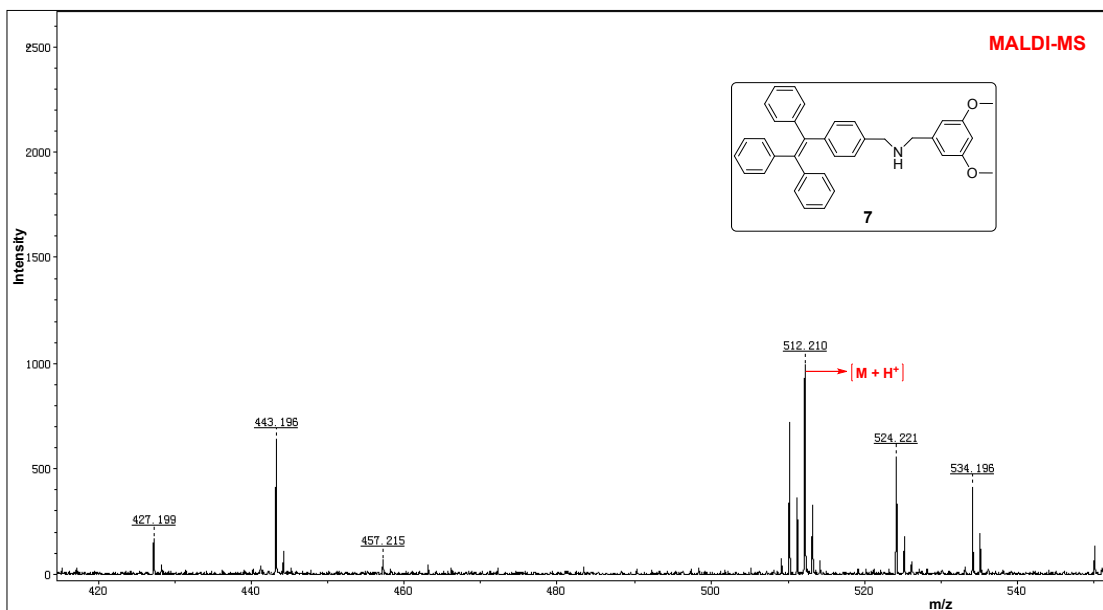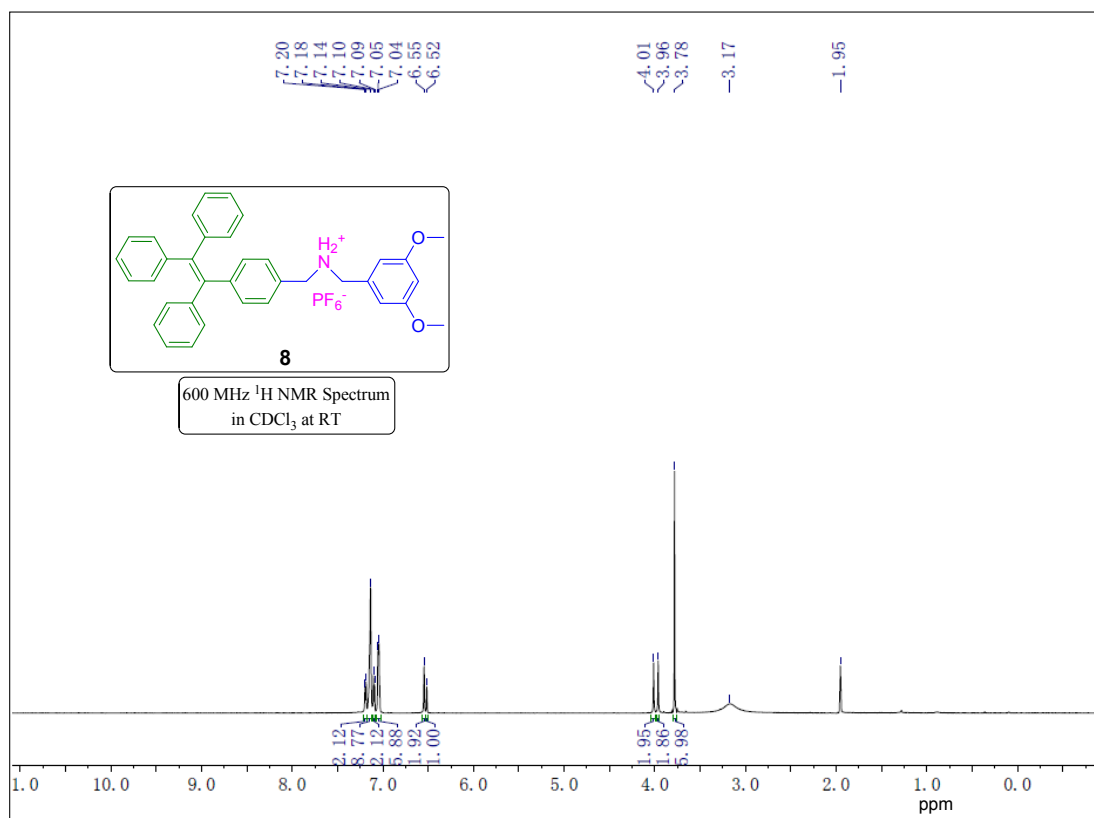

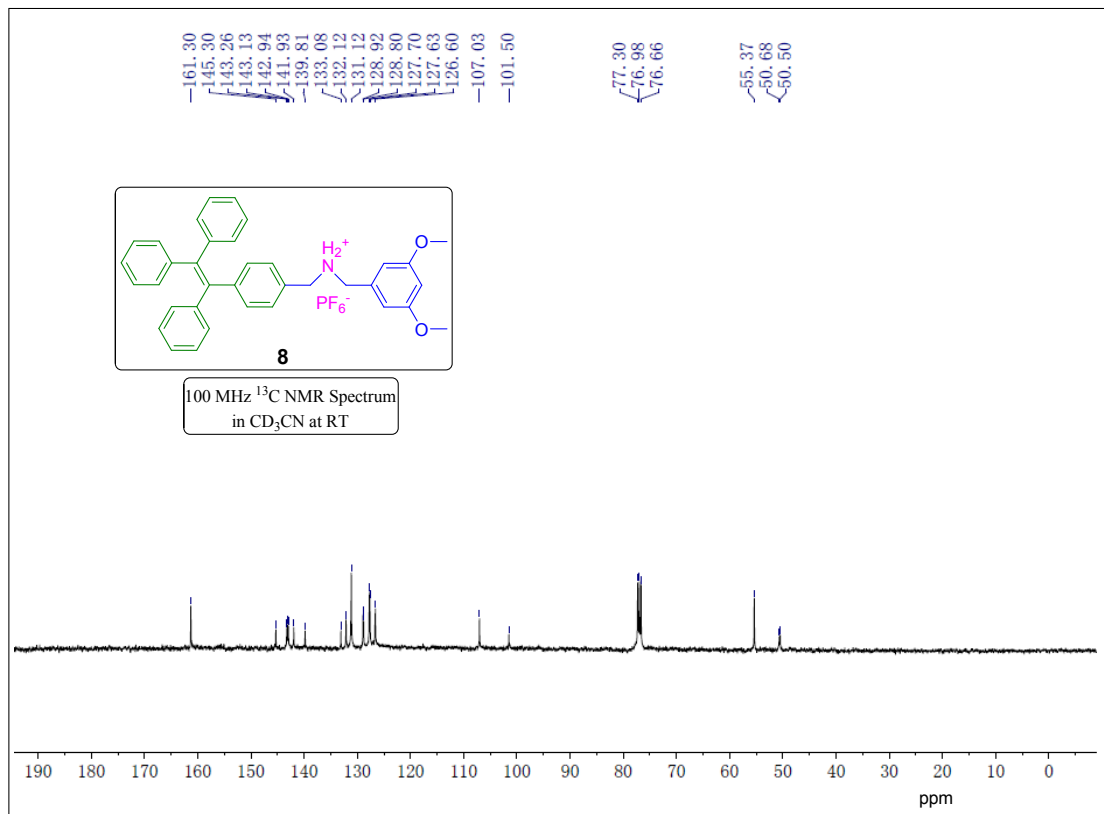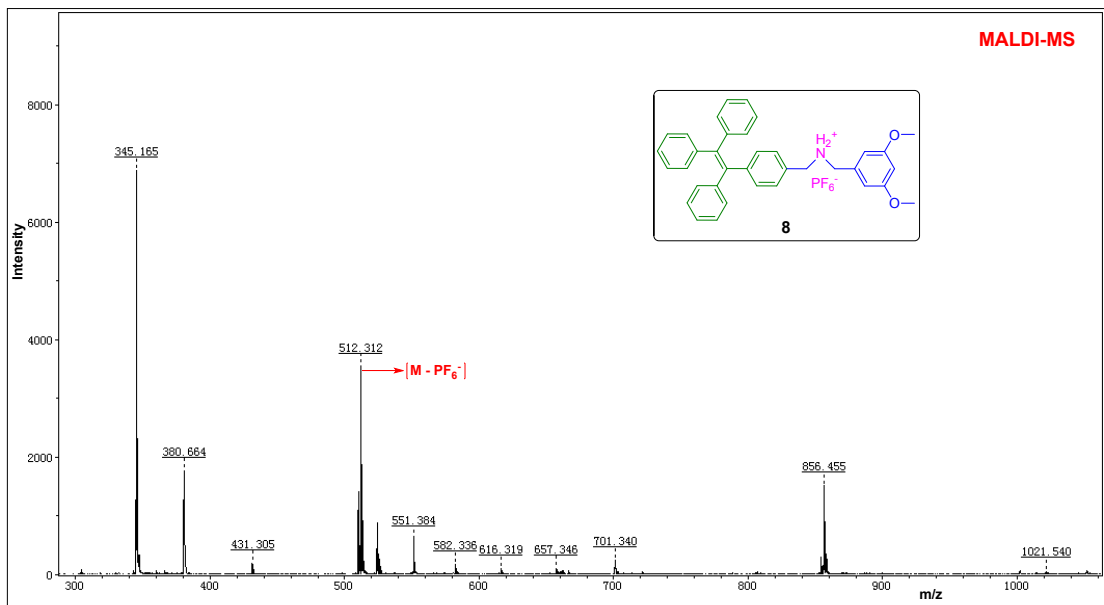



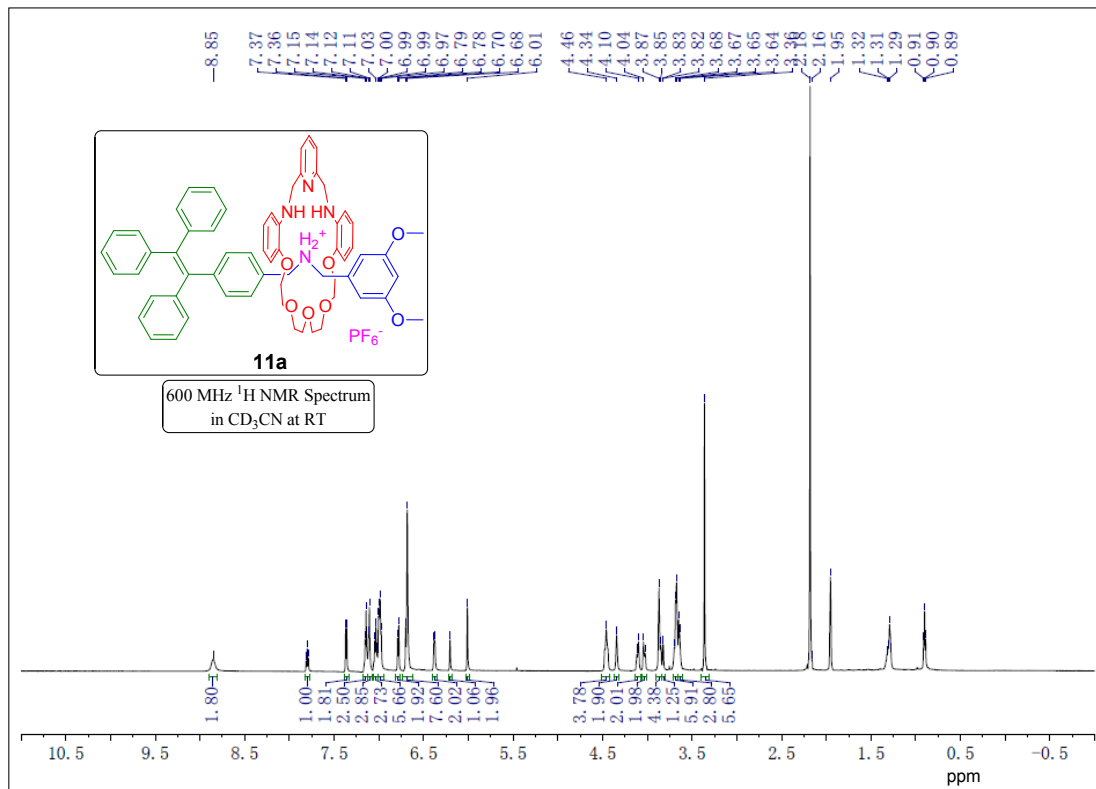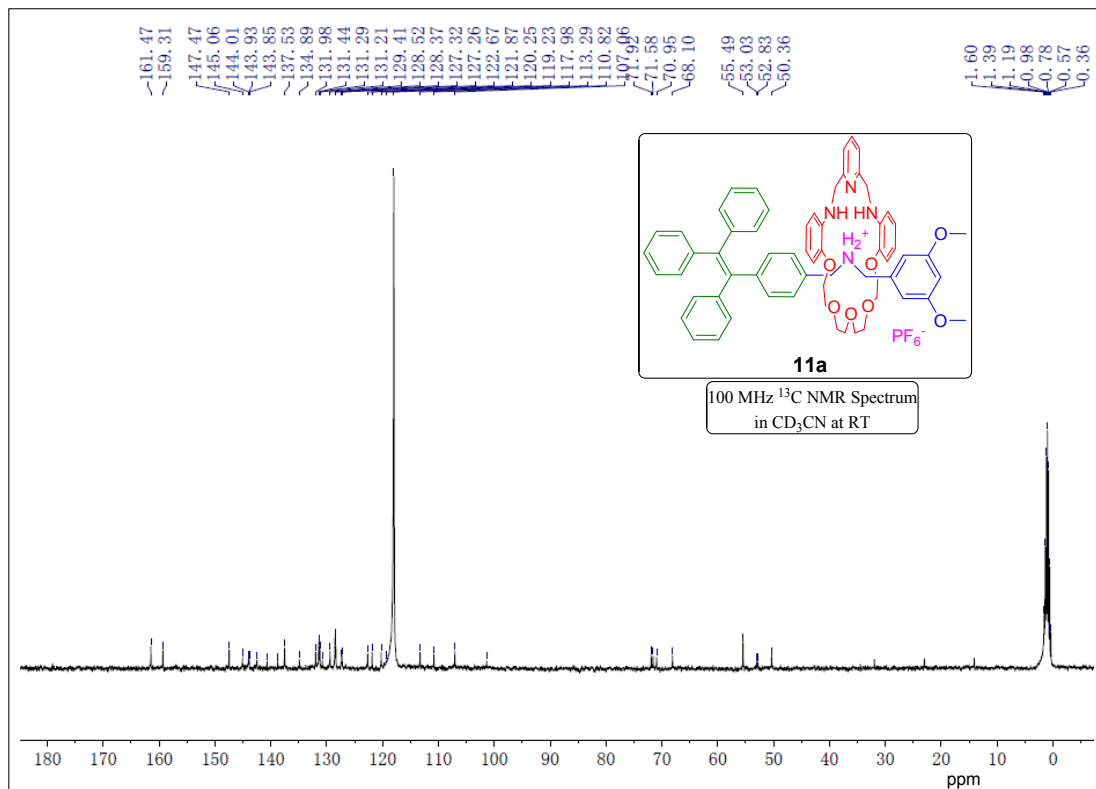

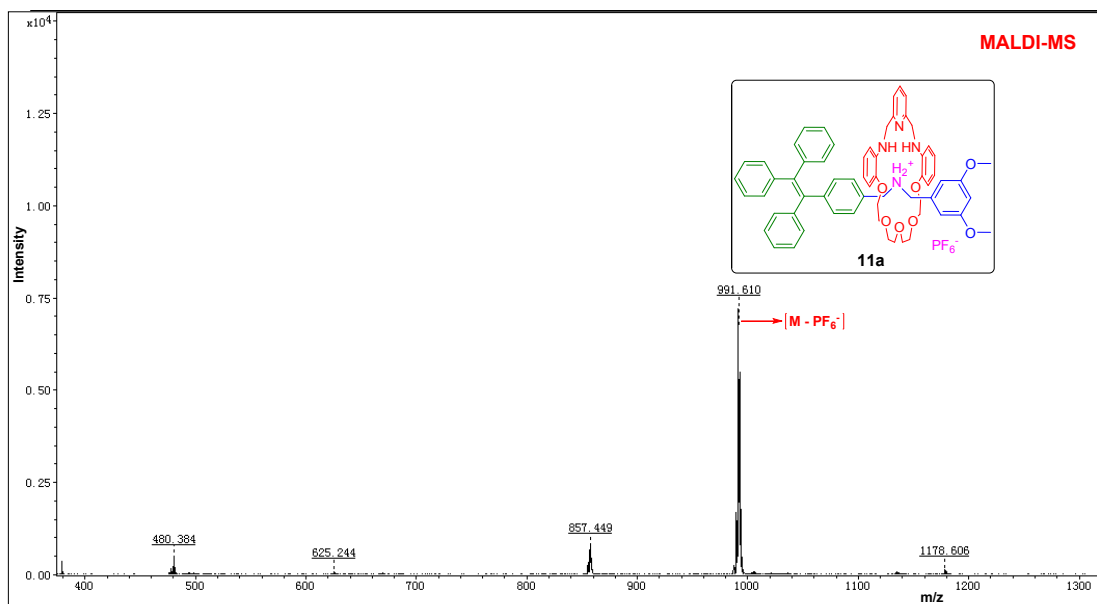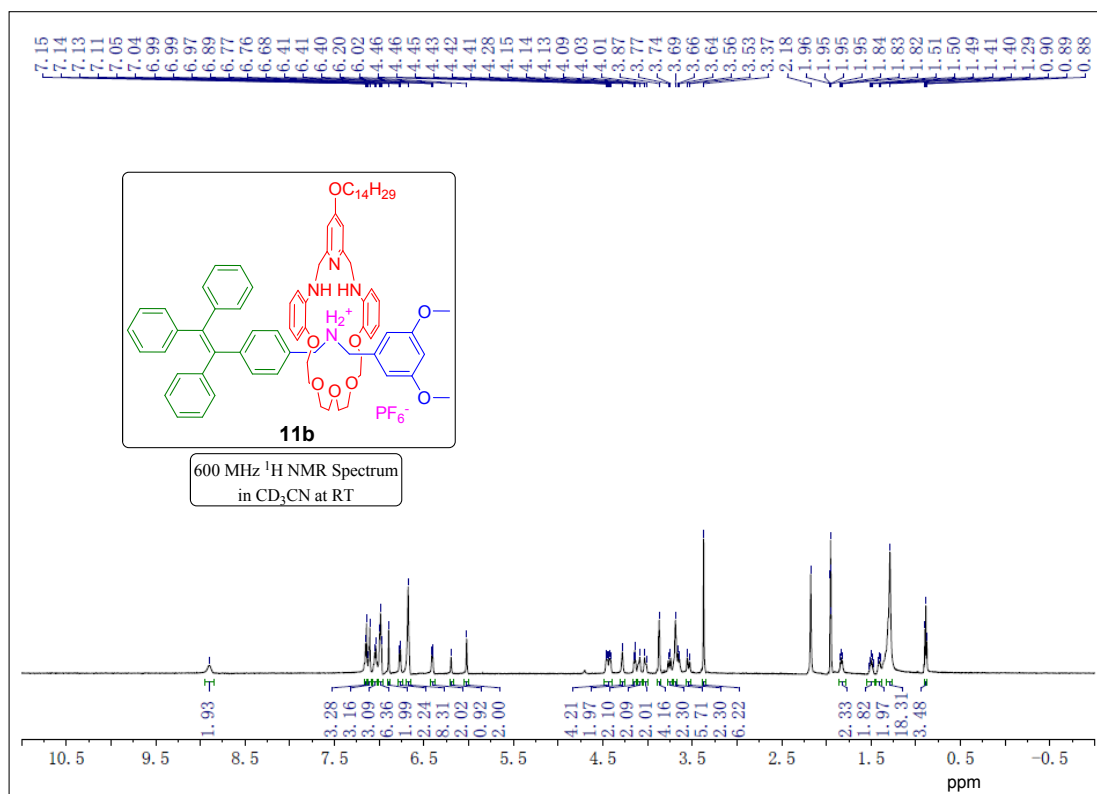

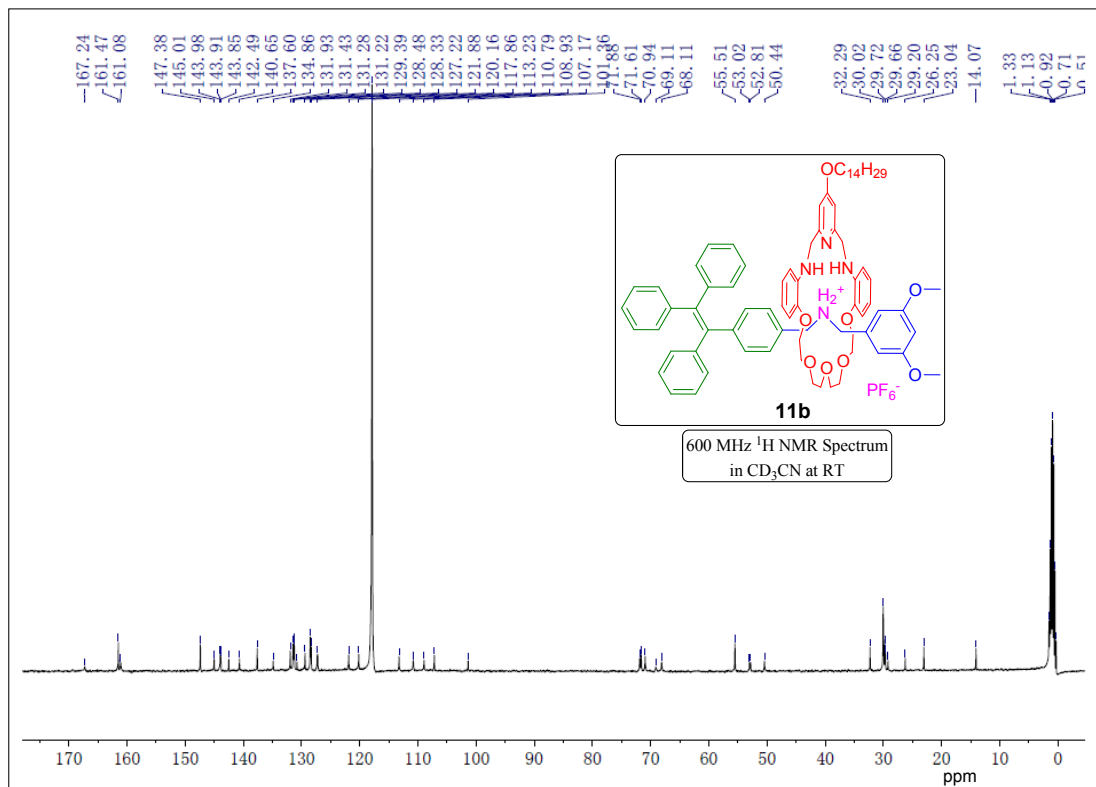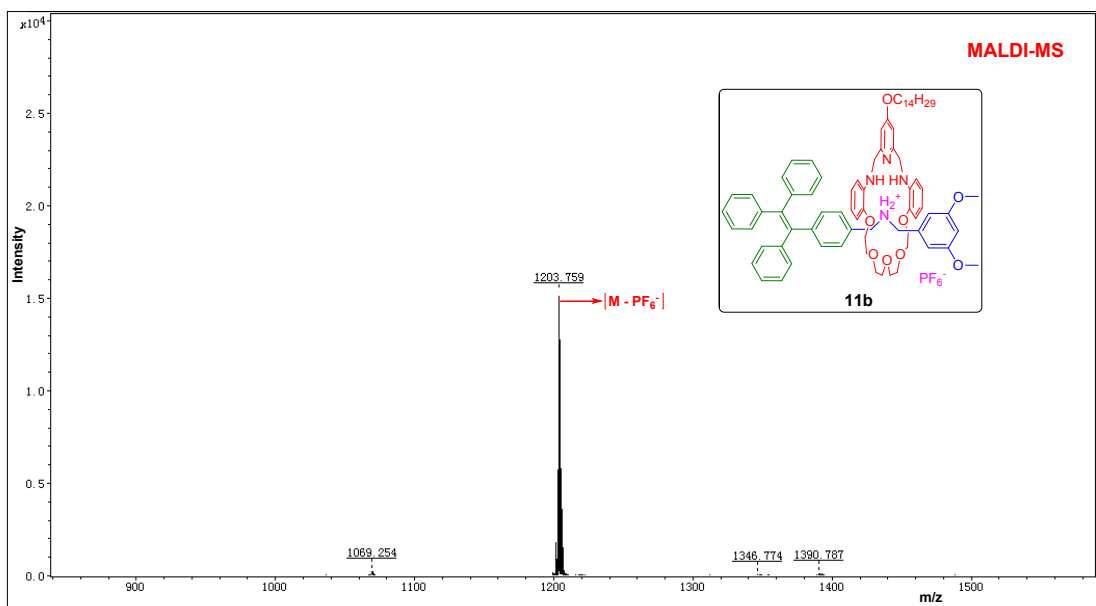

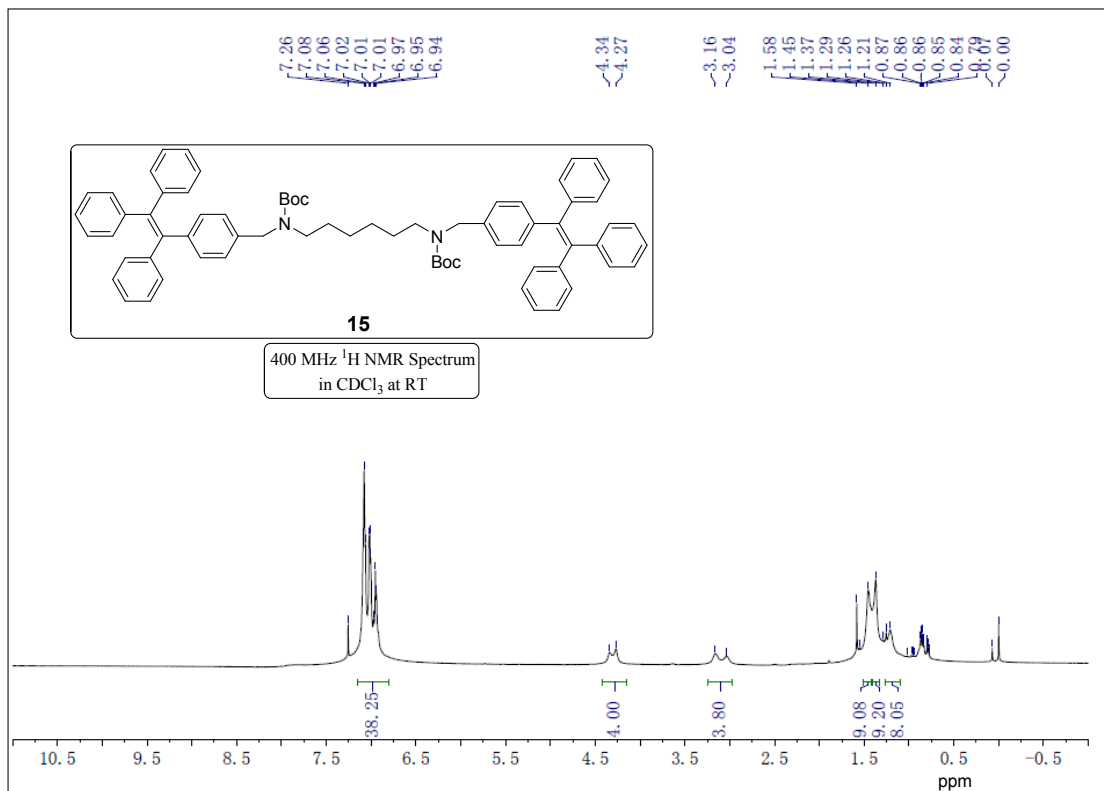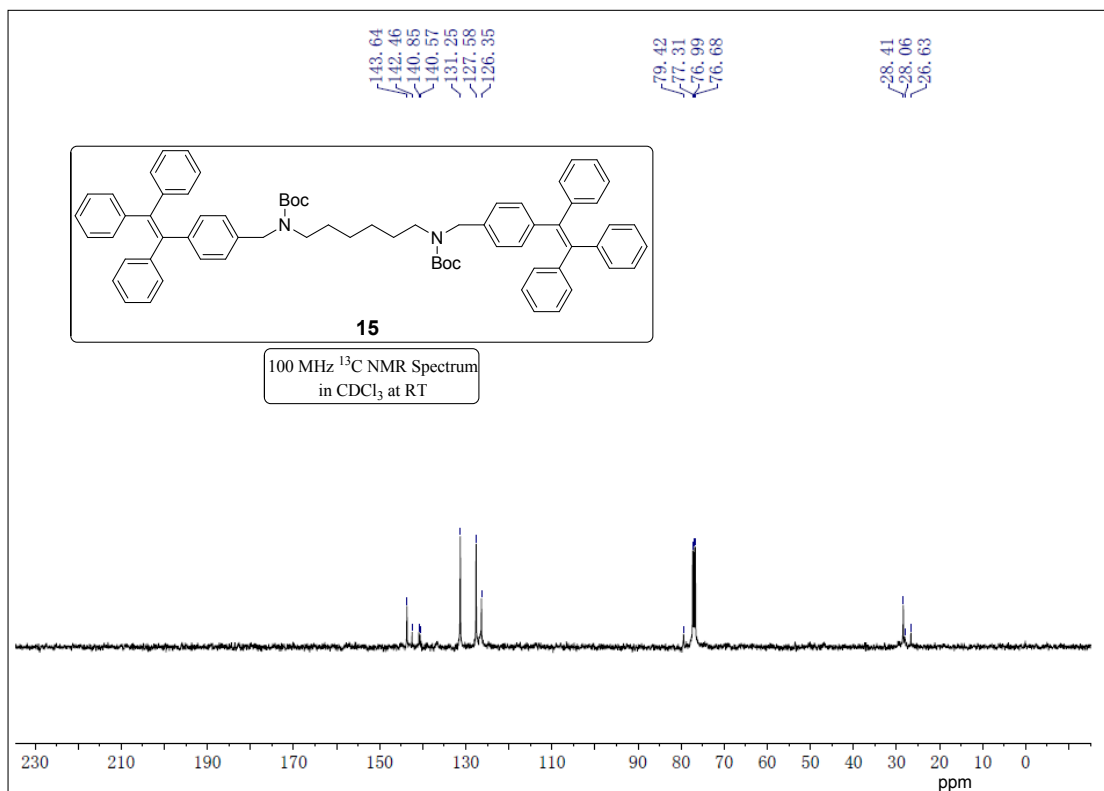

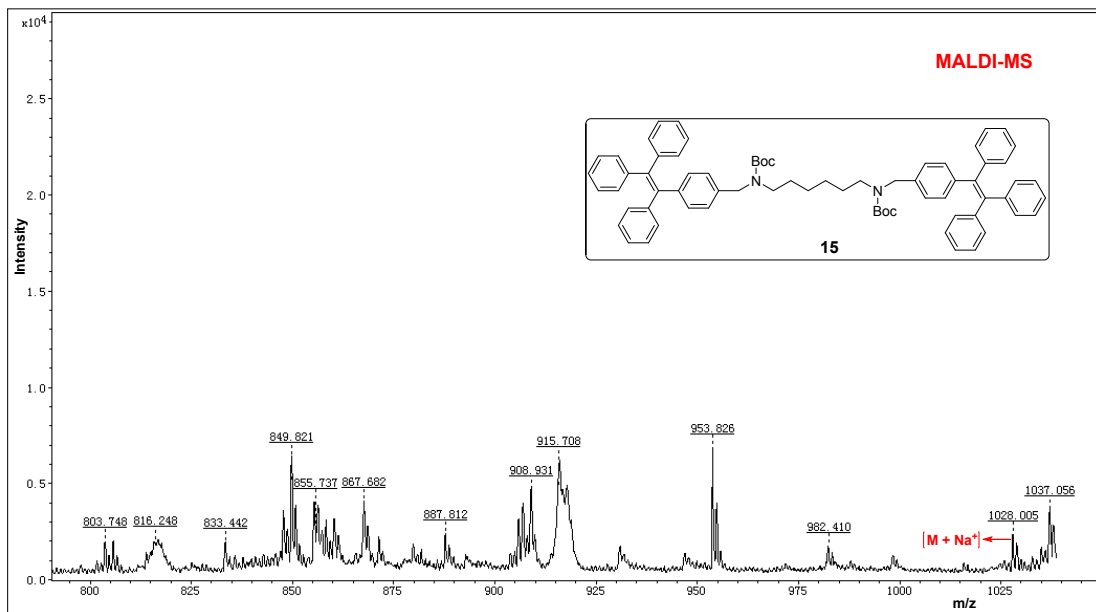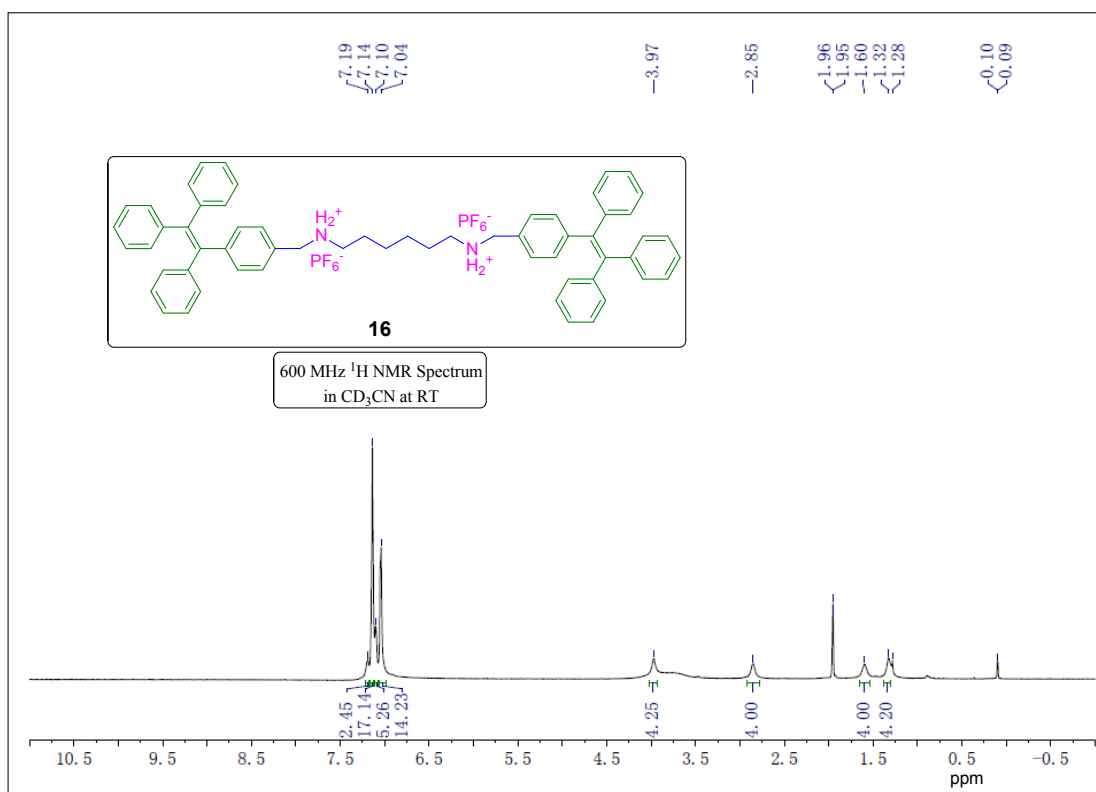

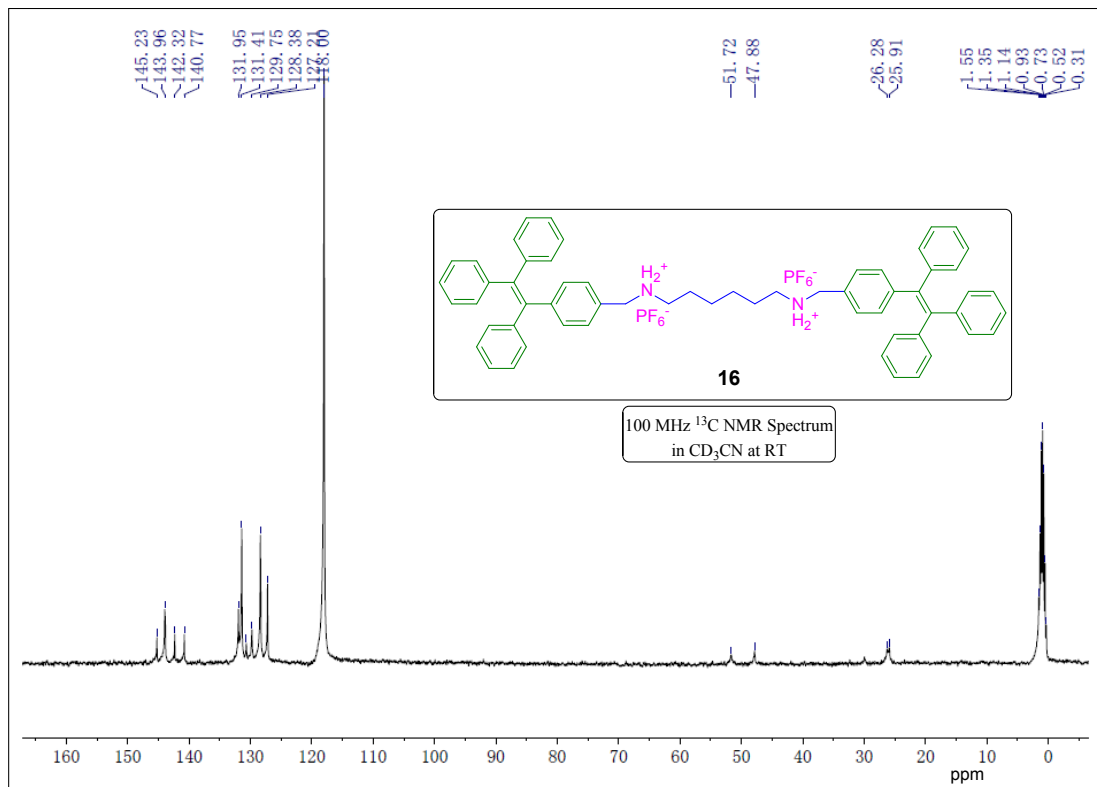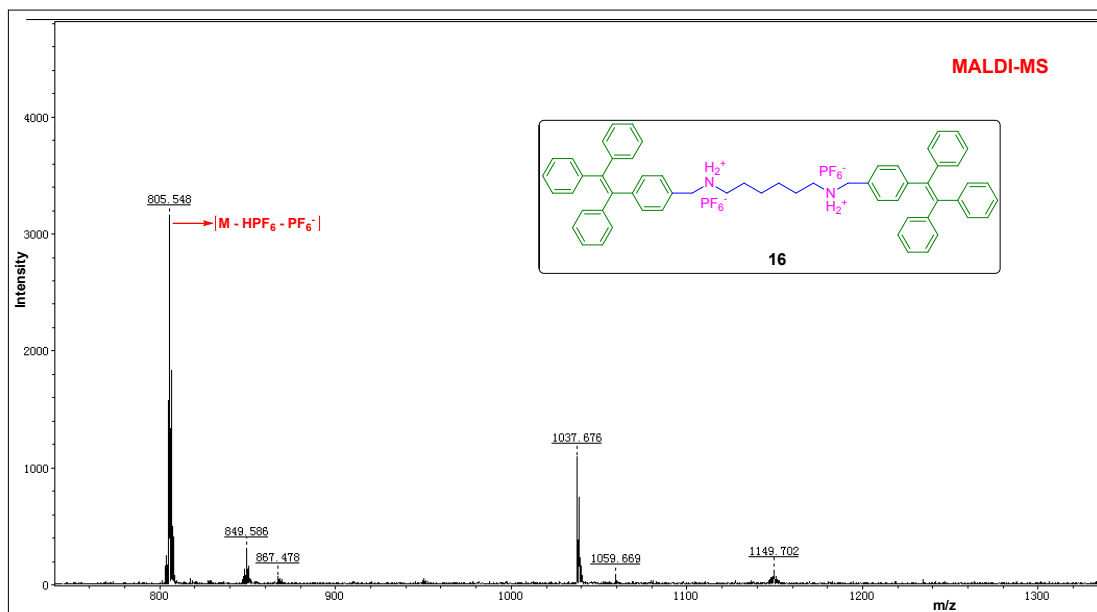

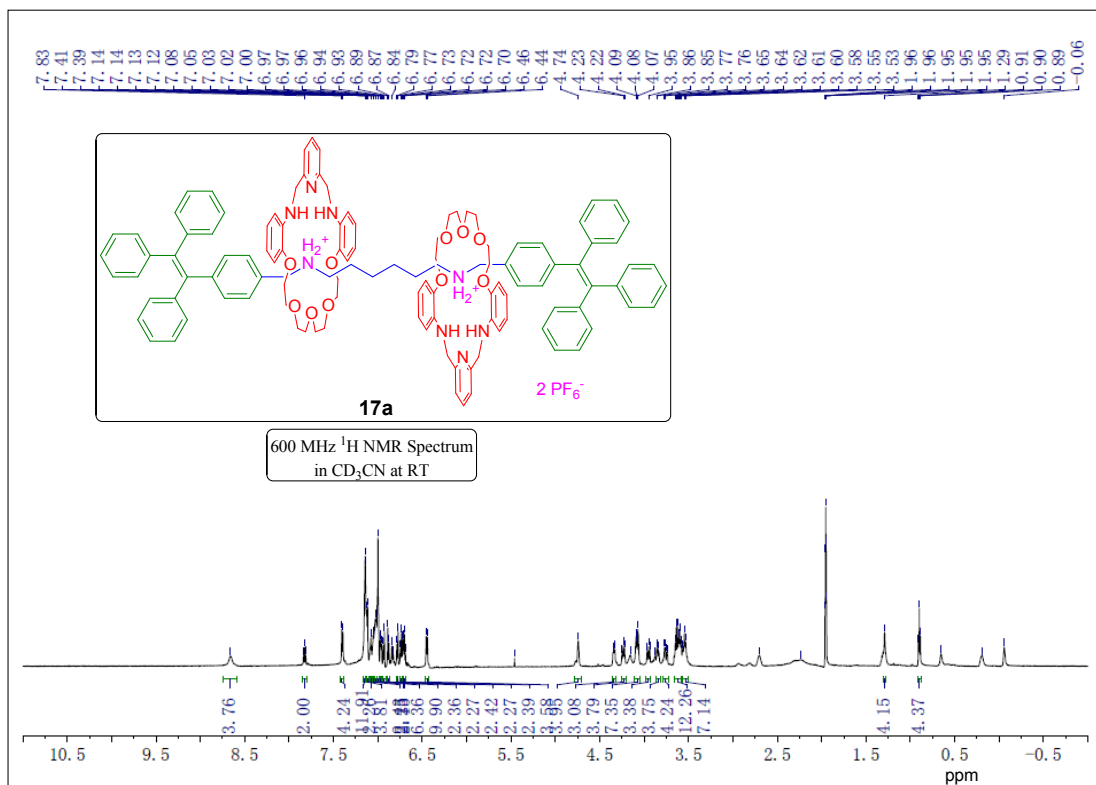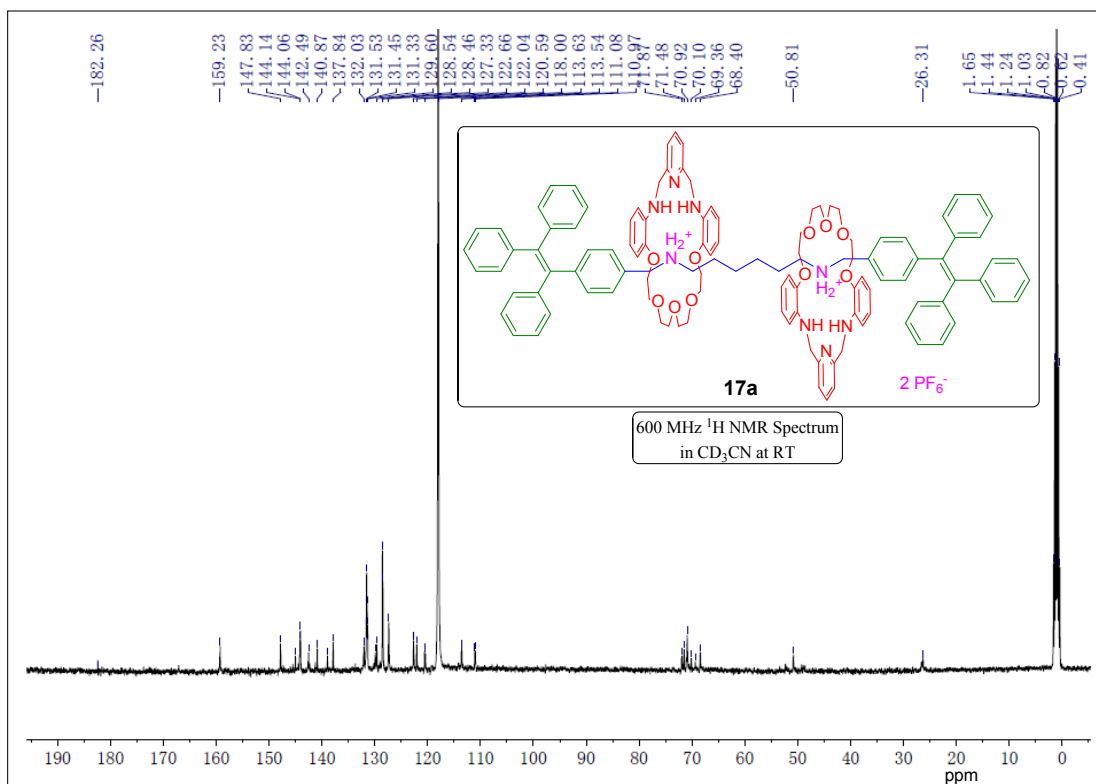

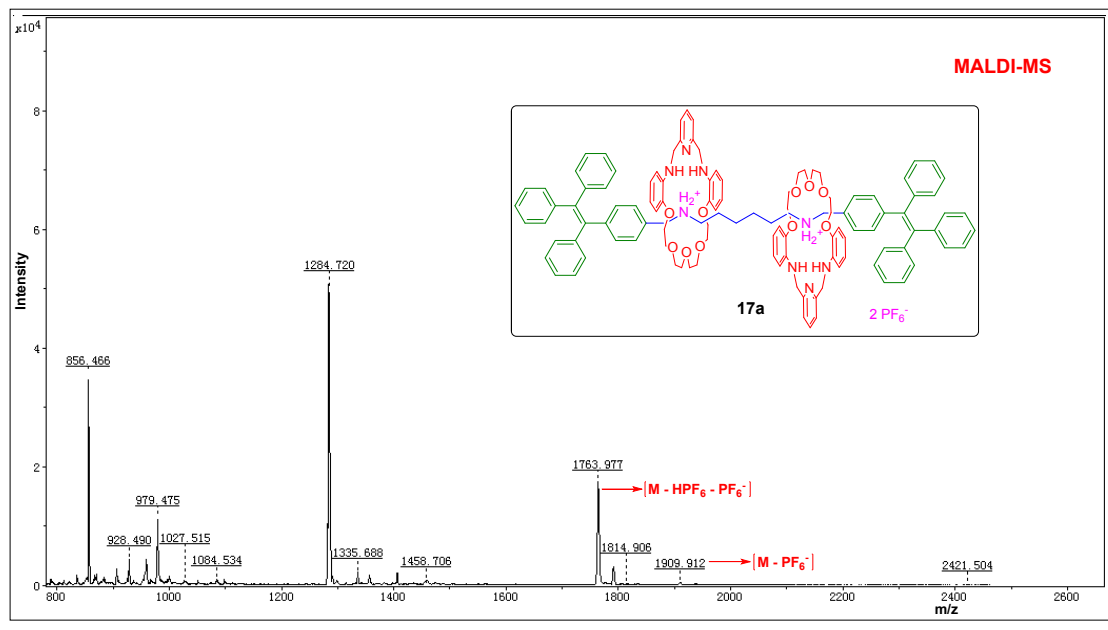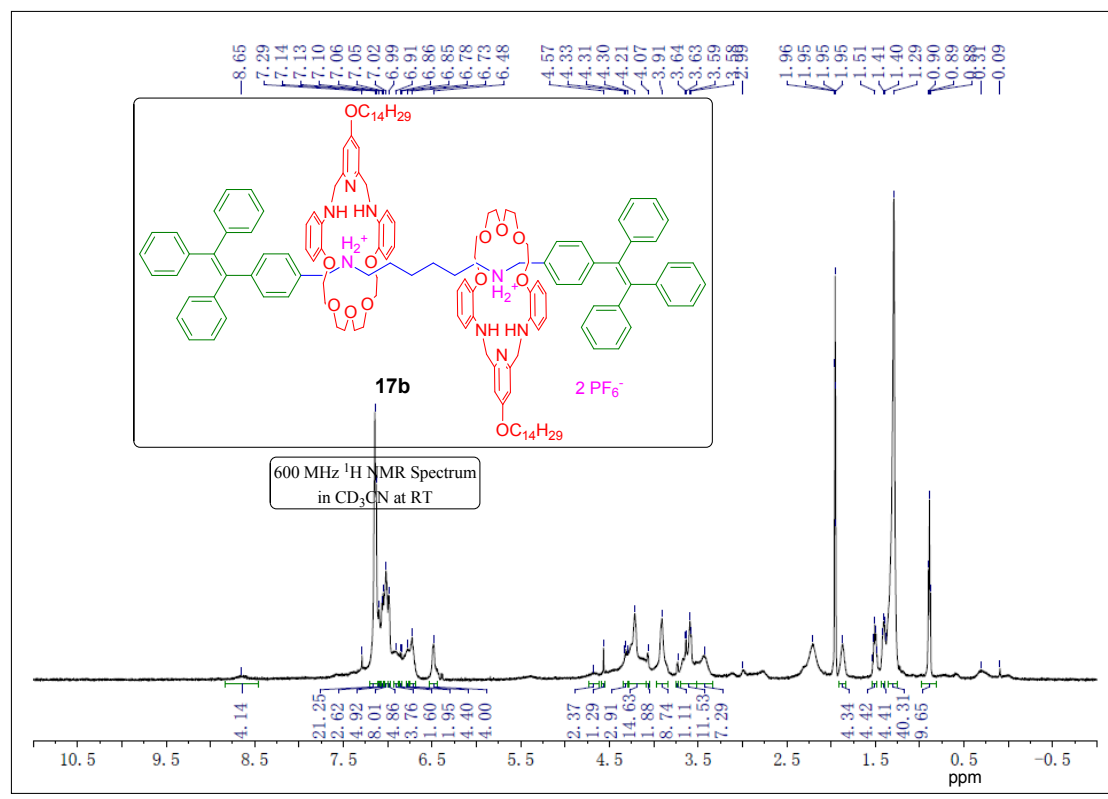



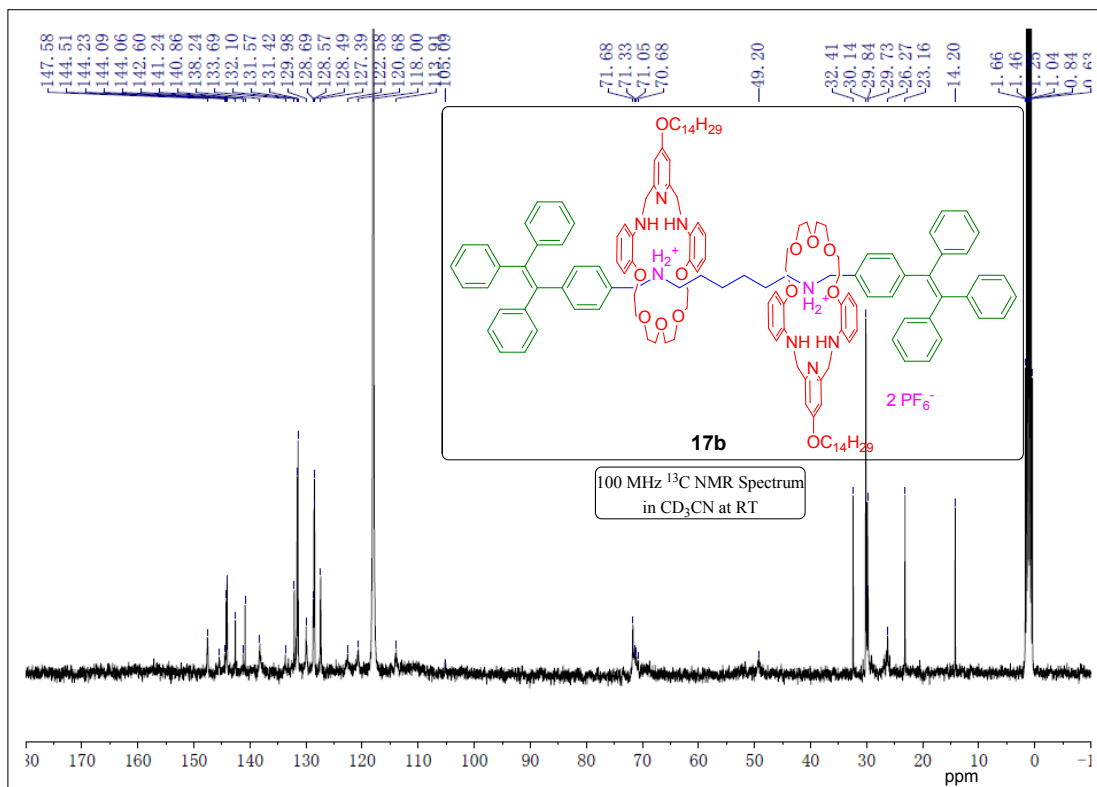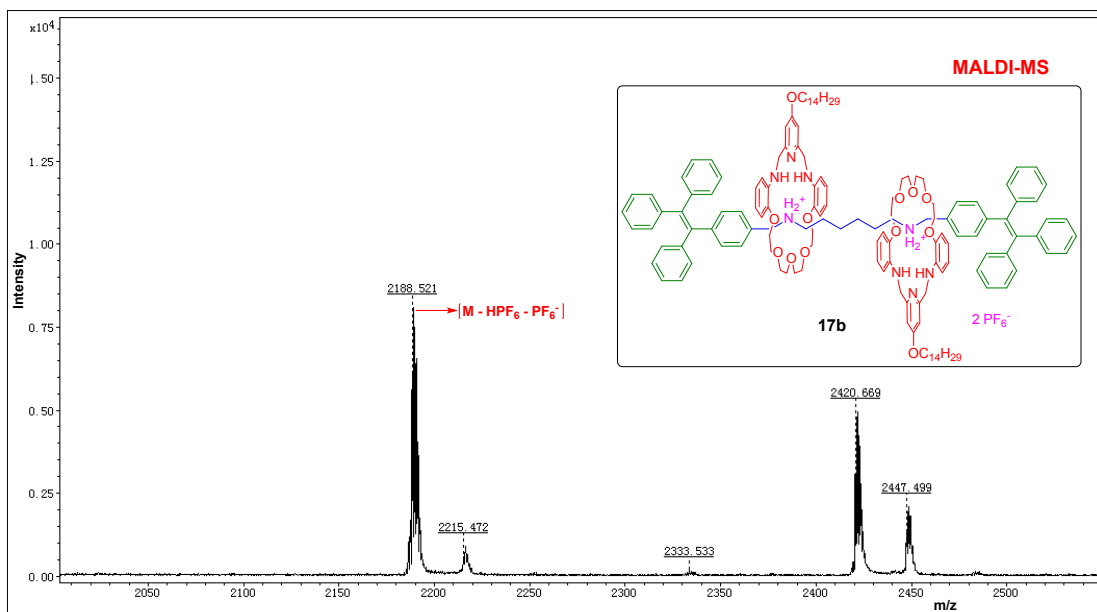

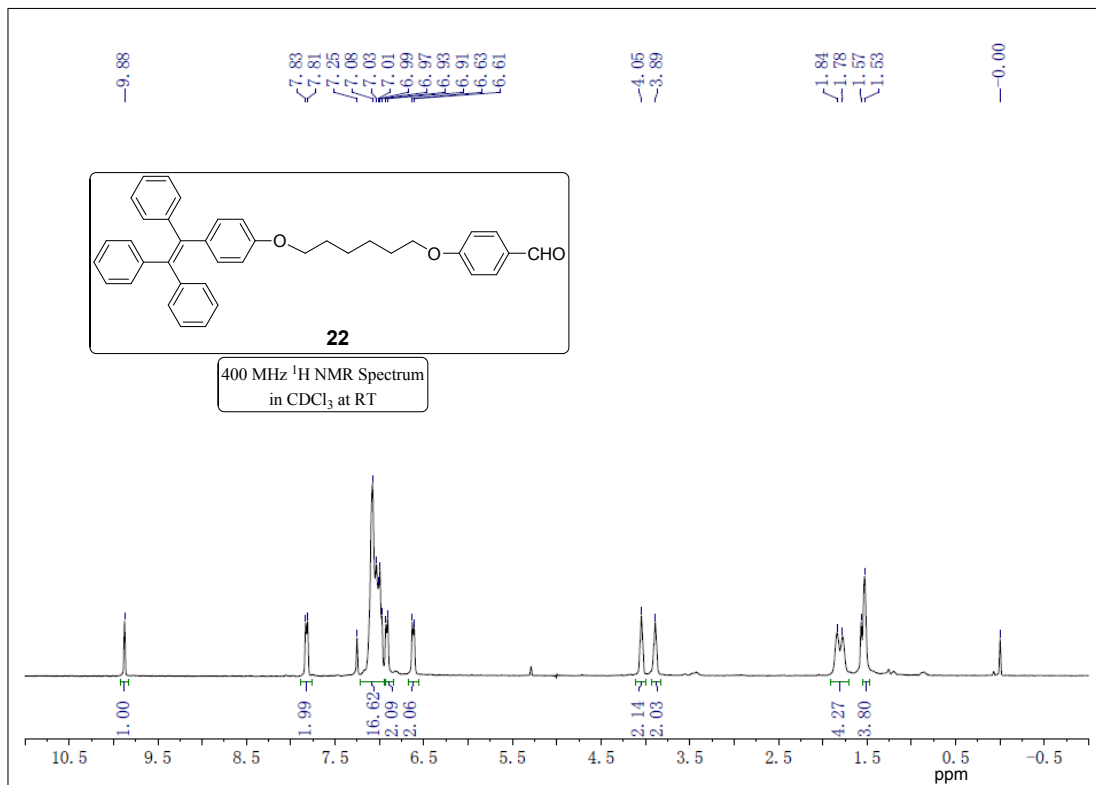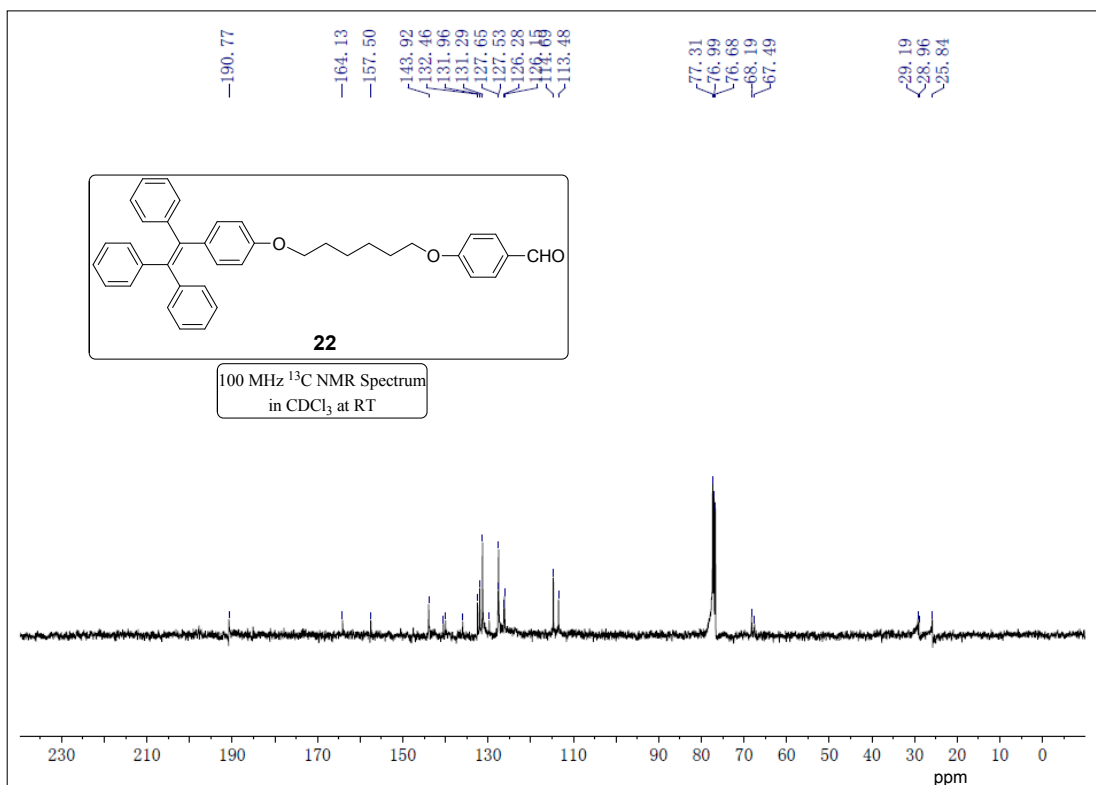

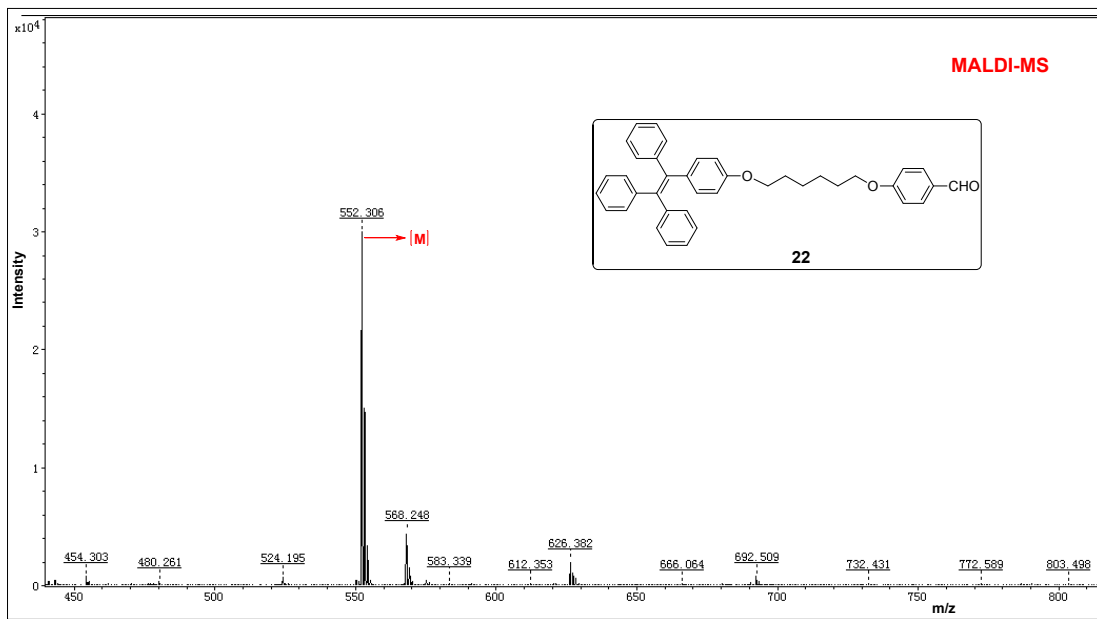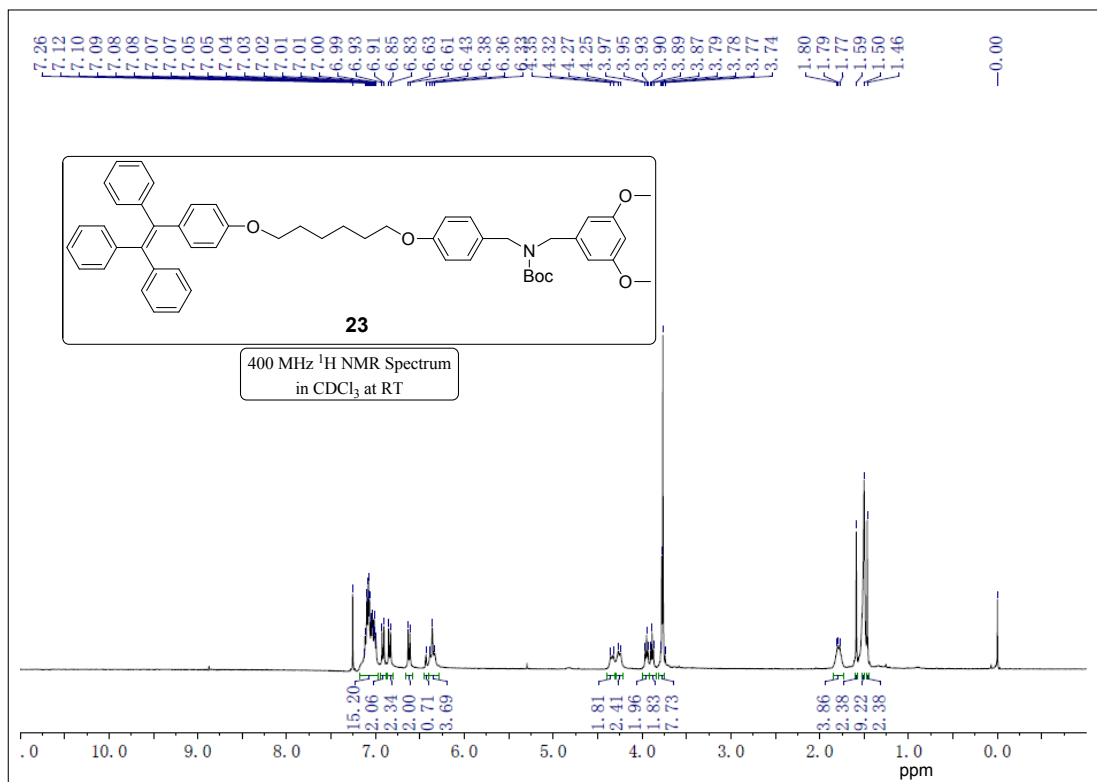

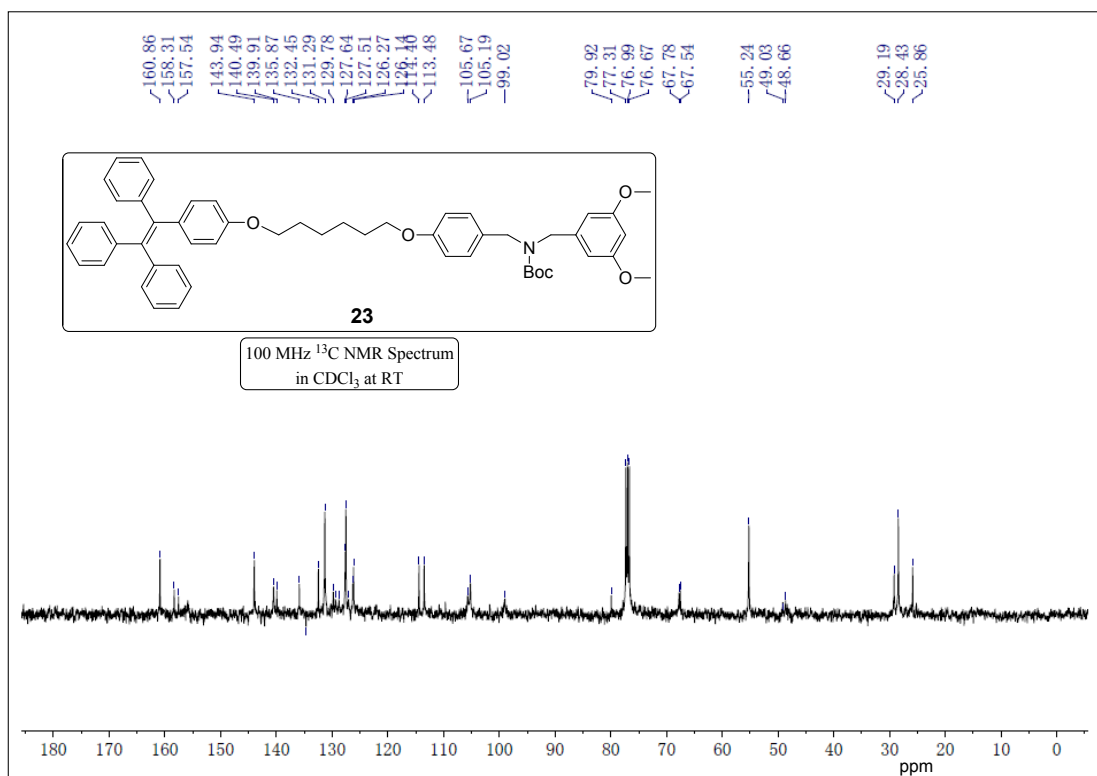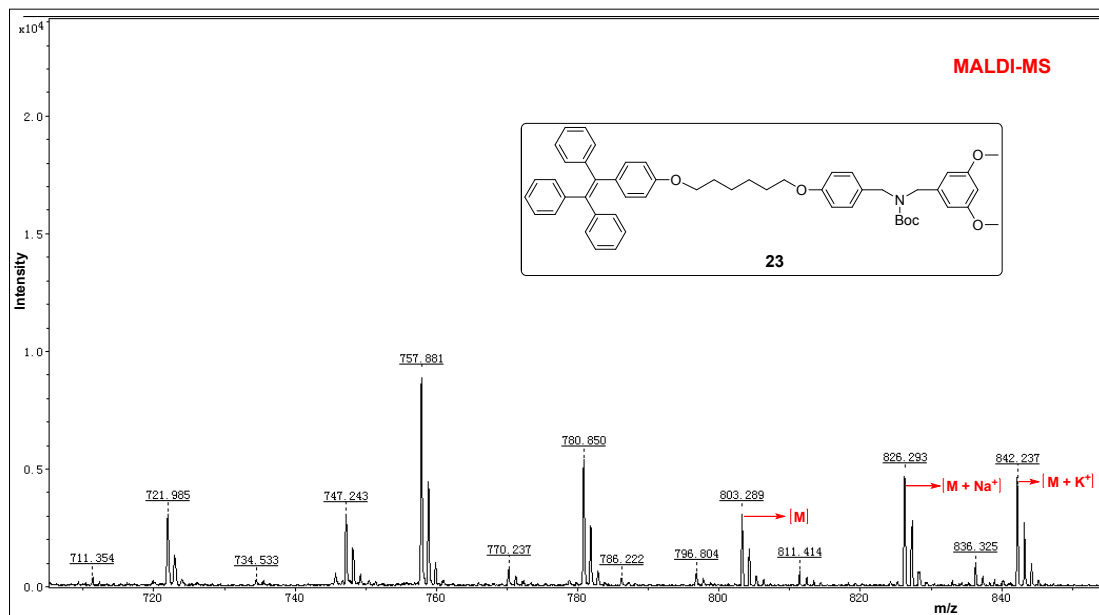

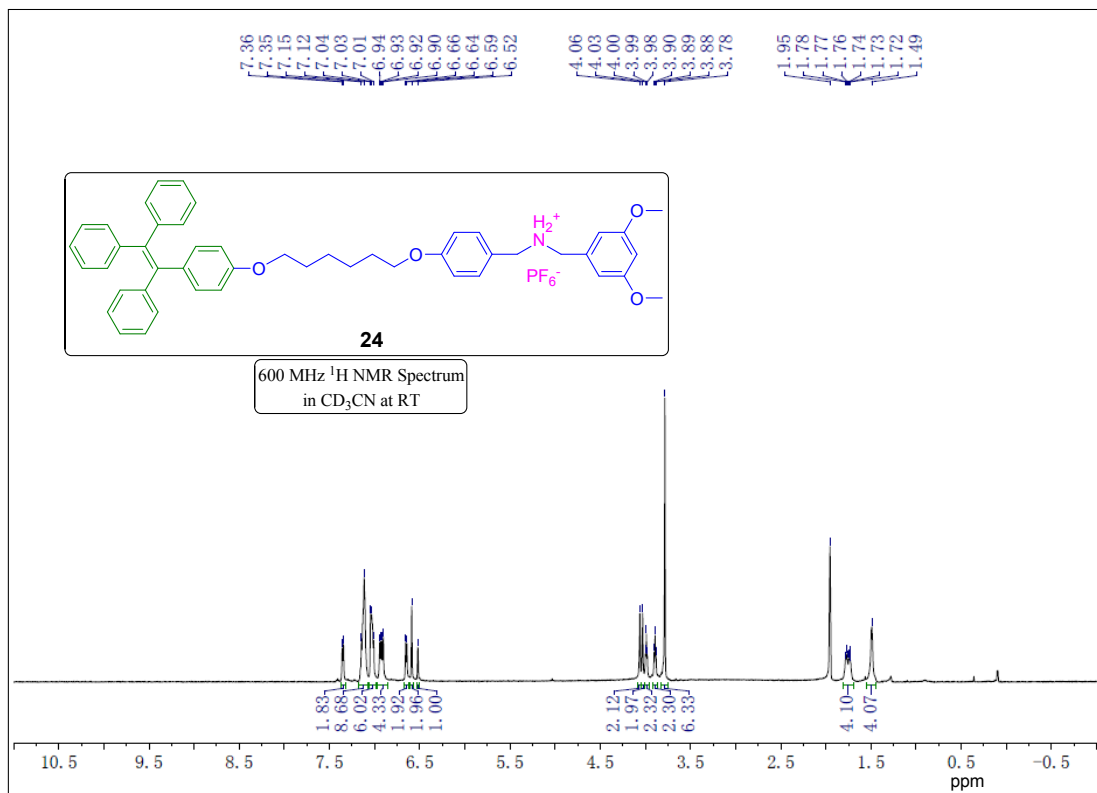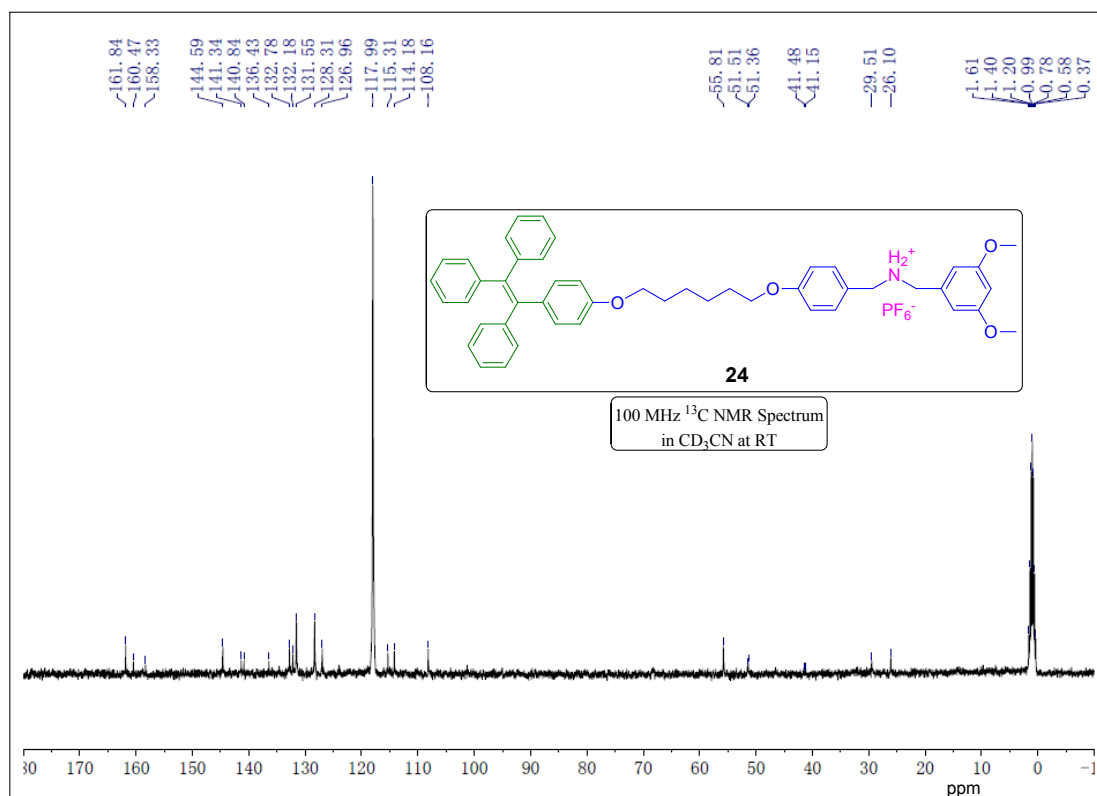

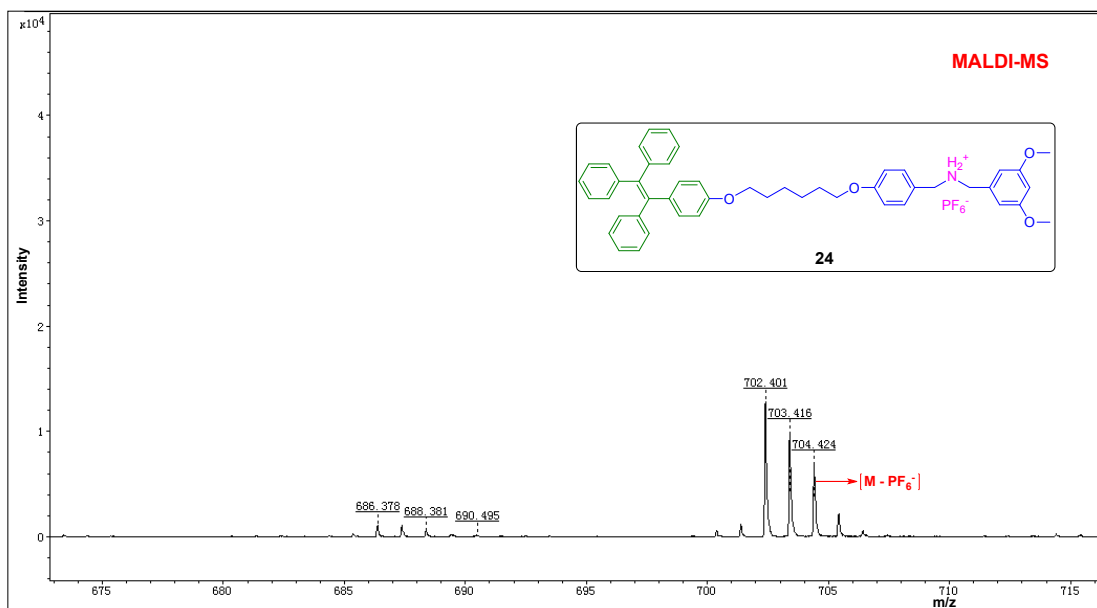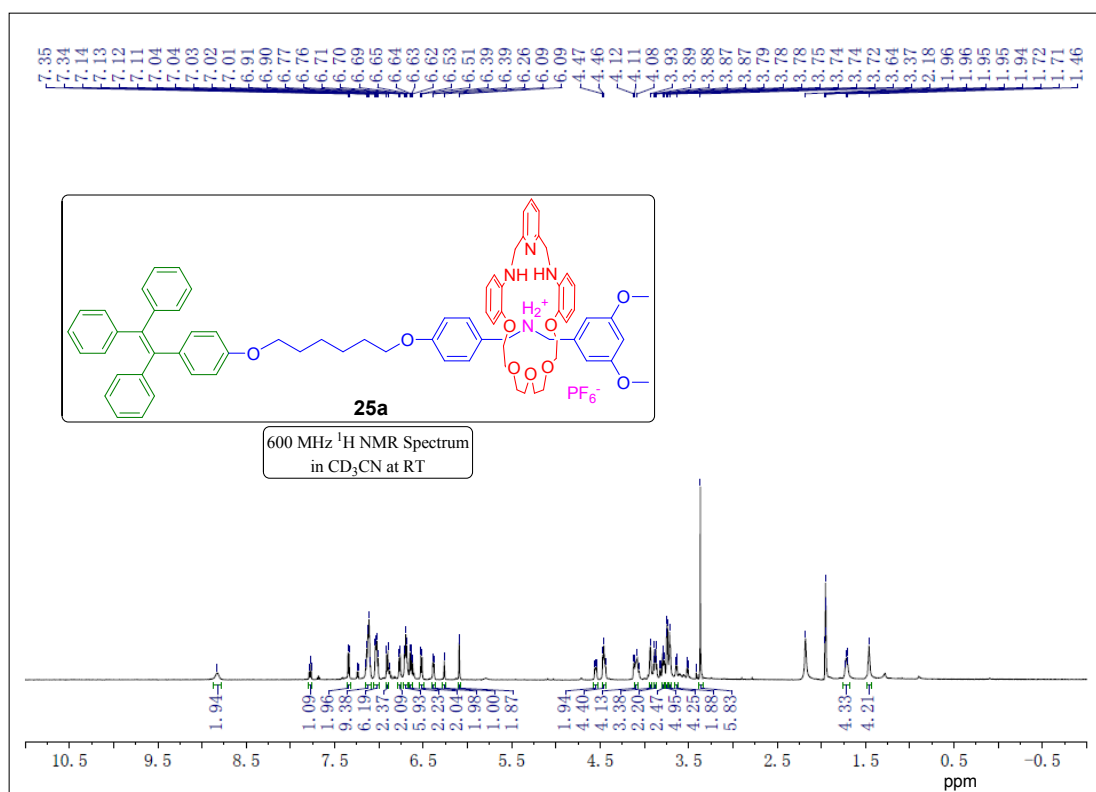

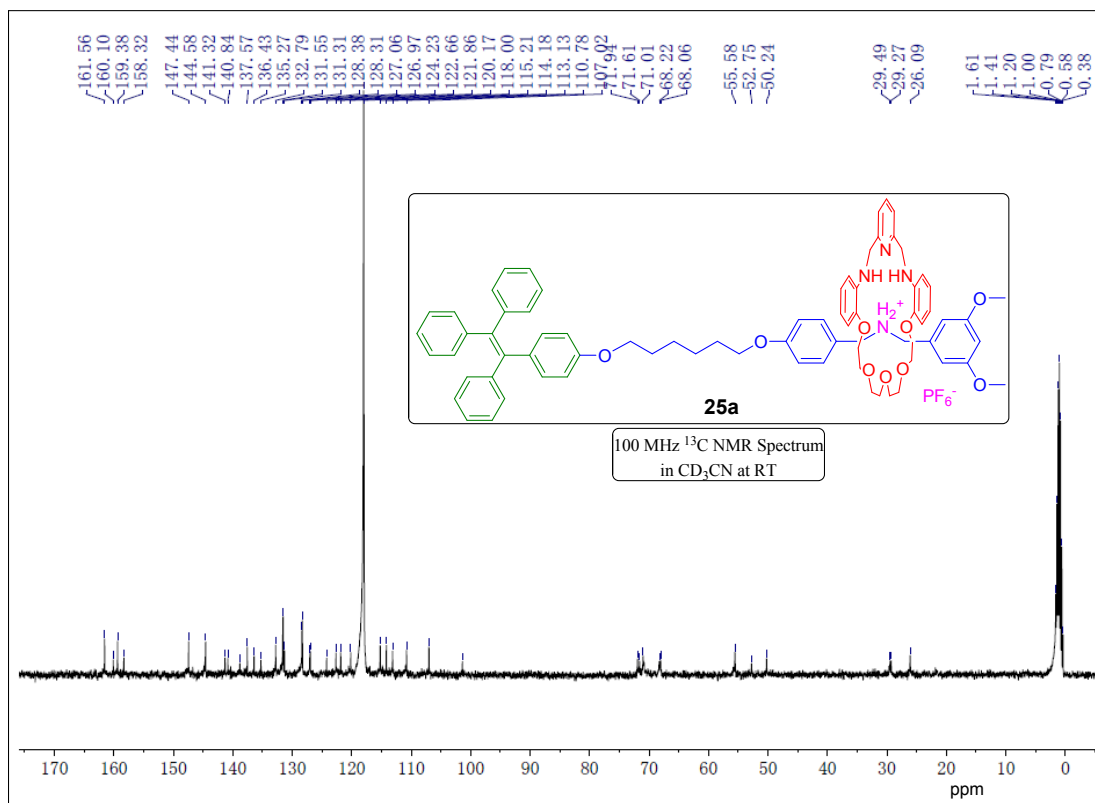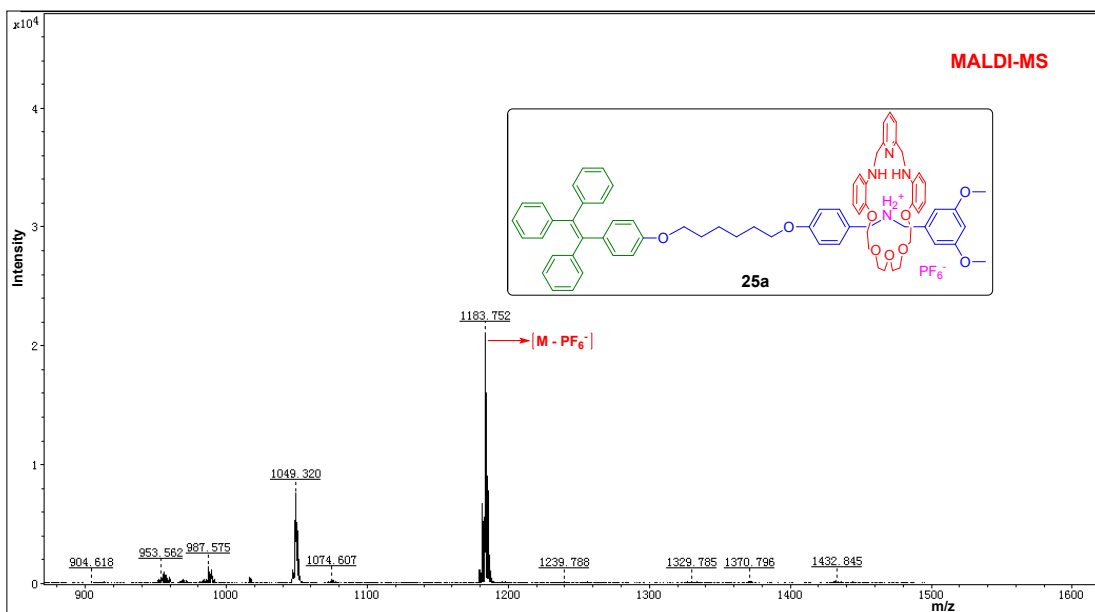

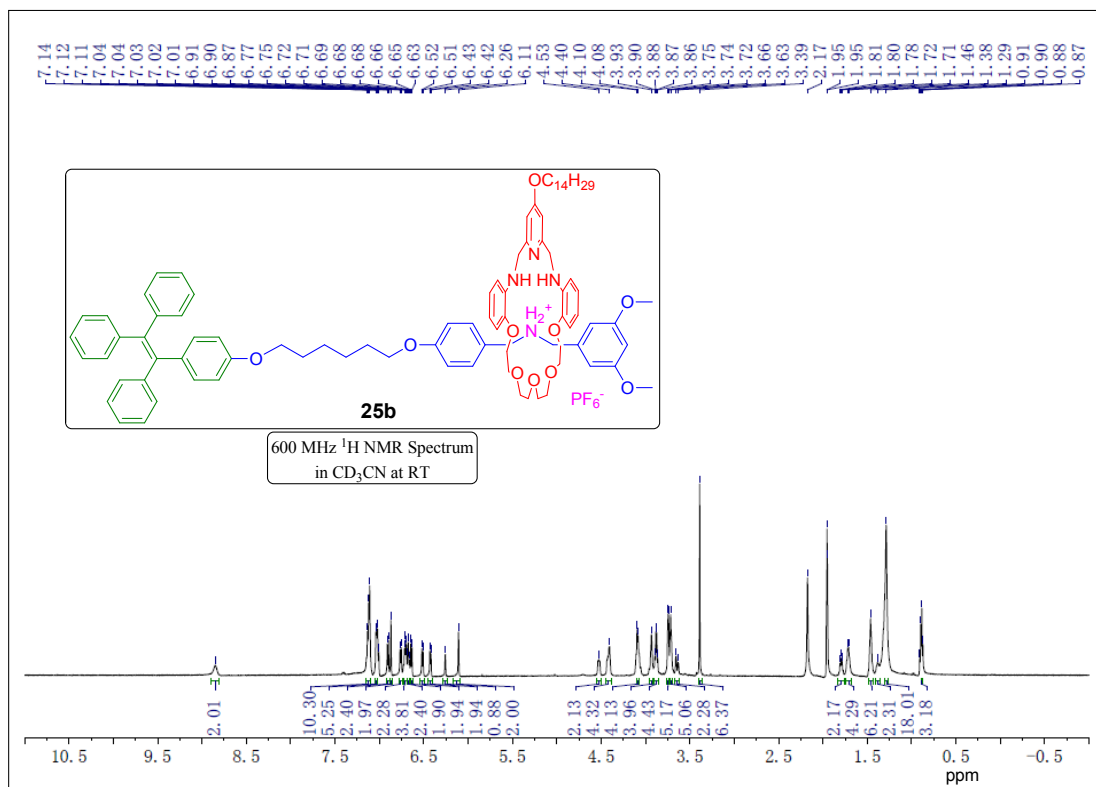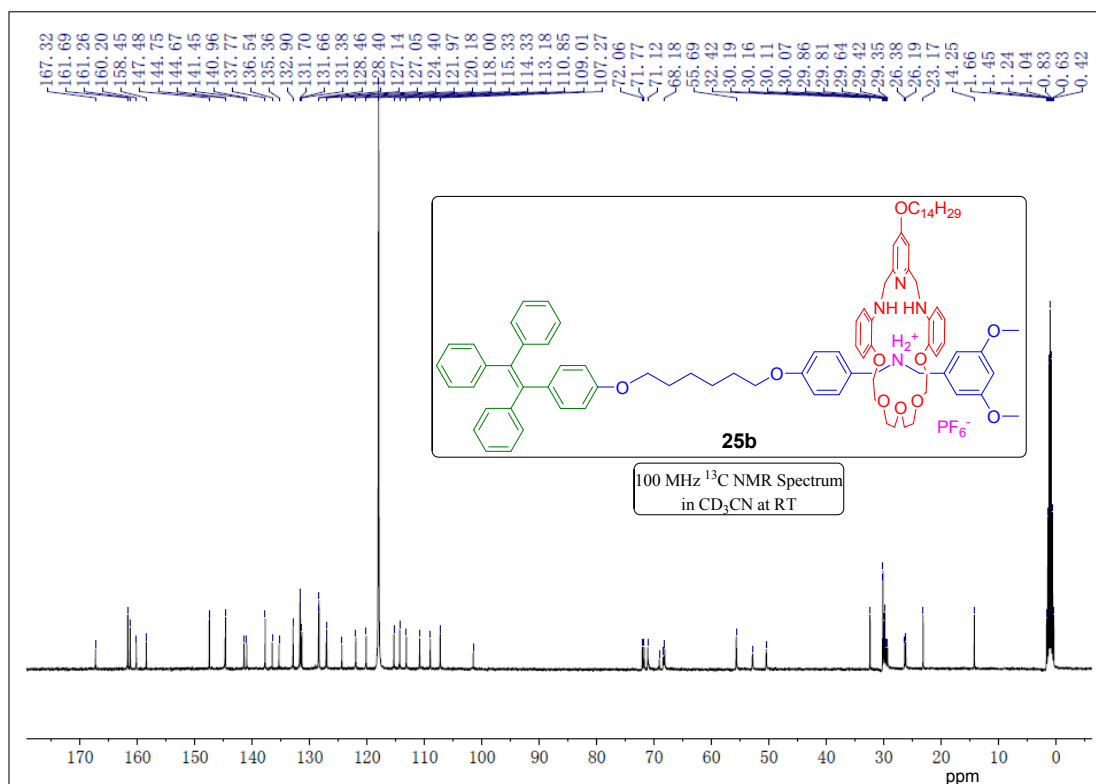



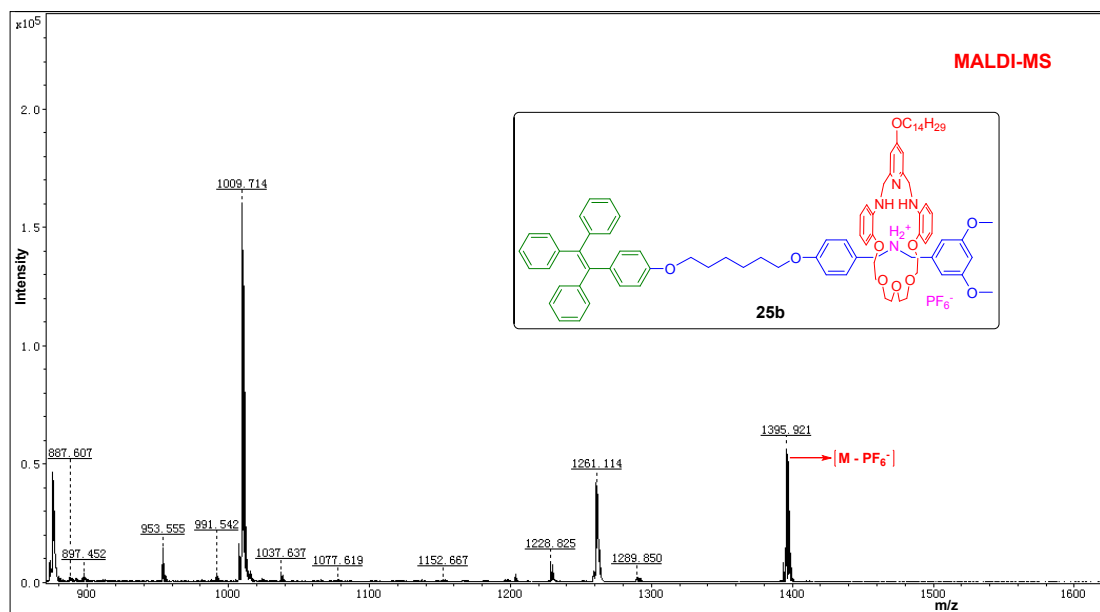

Supplement: c5ob00068h1.pdf [file c5ob00068h1.pdf]
